1

2

3

4

5

6 **Assessing anaerobic gut fungal (Neocalliamstigomycota) diversity**  
7 **using PacBio D1/D2 LSU rRNA amplicon sequencing and multi-**  
8 **year isolation**

**Radwa A. Hanafy, Britny Johnson, Noha H. Youssef, and Mostafa S. Elshahed\***

Department of Microbiology and Molecular Genetics, Oklahoma State University, Stillwater,  
OK

**\*Correspondence:** Mostafa Elshahed: [Mostafa@okstate.edu](mailto:Mostafa@okstate.edu)

9

## Abstract

10 The anaerobic gut fungi (AGF, Neocallimastigomycota) reside in the alimentary tracts of  
11 herbivores where they play a central role in the breakdown of ingested plant material. Accurate  
12 assessment of AGF diversity has been hampered by inherent deficiencies of the internal  
13 transcribed spacer1 (ITS1) region as a phylogenetic marker. Here, we report on the development  
14 and implementation of the D1/D2 region of the large ribosomal subunit (D1/D2 LSU) as a novel  
15 marker for assessing AGF diversity in culture-independent surveys. Sequencing a 1.4-1.5 Kbp  
16 amplicon encompassing the ITS1-5.8S rRNA-ITS2-D1/D2 LSU region in the ribosomal RNA  
17 locus from fungal strains and environmental samples generated a reference D1/D2 LSU database  
18 for all cultured AGF genera, as well as the majority of candidate genera encountered in prior  
19 ITS1-based diversity surveys. Subsequently, a D1/D2 LSU-based diversity survey using long  
20 read PacBio SMRT sequencing technology was conducted on fecal samples from 21 wild and  
21 domesticated herbivores. Twenty-eight genera and candidate genera were identified in the 17.7 K  
22 sequences obtained, including multiple novel lineages that were predominantly, but not  
23 exclusively, identified in wild herbivores. Association between certain AGF genera and animal  
24 lifestyles, or animal host family was observed. Finally, to address the current paucity of AGF  
25 isolates, concurrent isolation efforts utilizing multiple approaches to maximize recovery yielded  
26 216 isolates belonging to twelve different genera, several of which have no prior cultured-  
27 representatives. Our results establish the utility of D1/D2 LSU and PacBio sequencing for AGF  
28 diversity surveys, and the culturability of a wide range of AGF taxa, and demonstrate that wild  
29 herbivores represent a yet-untapped reservoir of AGF diversity.

30

## Introduction

31 Members of the anaerobic gut fungi (AGF) are strict anaerobes that inhabit the rumen and  
32 alimentary tract of a wide range of foregut and hindgut herbivores. The AGF play an important  
33 role in the breakdown of ingested plant biomass via enzymatic and physical disruption in the  
34 herbivorous gut <sup>1</sup>. AGF represent a distinct basal fungal phylum (Neocallimastigomycota) that  
35 evolved 66 ( $\pm 10$ ) million years ago coinciding, and possibly enabling, mammalian transition  
36 from insectivory to herbivory <sup>2</sup>.

37 Culture independent amplicon-based diversity surveys have been widely utilized to gauge  
38 anaerobic fungal diversity and community structure in herbivores <sup>3,4,5,6</sup>. The internal transcribed  
39 spacer1 (ITS1) region within the ribosomal operon has been almost exclusively utilized as the  
40 phylogenetic marker of choice in culture-independent sequence-based phylogenetic assessments  
41 of AGF diversity <sup>7</sup>. Such choice is a reflection of its wider popularity as a marker within the  
42 kingdom Mycota <sup>8,9</sup>, the high sequence similarity and limited discriminatory power of the 18S  
43 rRNA gene between various AGF taxa <sup>10</sup>, and its relatively shorter length, allowing high  
44 throughput pyrosequencing- and Illumina-based diversity assessments <sup>3,6</sup>. However, concerns for  
45 the use of ITS1 in diversity assessment for the Mycota <sup>11</sup>, basal fungi <sup>12</sup>, and the  
46 Neocallimastigomycota <sup>7</sup> have been voiced. The ITS1 region is polymorphic, exhibiting  
47 considerable secondary structure (number and organization of helices <sup>13</sup>), and length <sup>14</sup>  
48 variability. Such polymorphism renders automated alignments, reproducible sequence  
49 divergence estimates, and classification of sequence data unreliable and highly dependent on  
50 alignment strategies and parameters specified. In addition, significant sequence divergence  
51 between copies of the ITS1 region within a single strain have been reported (up to 12.9% in <sup>15</sup>),  
52 values that exceed cutoffs utilized for species (even genus in some instances) level delineation

53 from sequence data <sup>3, 16, 17, 18</sup>. Such limitations often necessitate laborious subjective manual  
54 curation and secondary structure incorporation into alignment strategies <sup>13</sup>, although it is well  
55 recognized that these efforts only partially alleviate, rather than completely address, such  
56 fundamental limitations.

57 The 28S large ribosomal subunit (LSU) is one of the original genes proposed for fungal  
58 barcoding <sup>12</sup>. Hypervariable domains 1 and 2 <sup>19</sup> within the LSU molecule (D1/D2 LSU) have  
59 previously been utilized for differentiating strains of AGF via molecular typing <sup>20, 21, 22</sup>, or  
60 sequencing <sup>23, 24</sup>. Compared to ITS1, D1/D2 LSU region exhibits much lower levels of length  
61 heterogeneity and intra-strain sequence divergence in fungi <sup>25</sup>, including the AGF <sup>20</sup>.  
62 Identification and taxonomic assignment of AGF strains based on D1/D2 LSU have gathered  
63 momentum; and D1/D2 LSU-based phylogenetic analysis has been reported in all manuscripts  
64 describing novel taxa since 2015 <sup>15, 26, 27, 28, 29, 30, 50</sup>. The potential use of D1/D2 LSU as a marker  
65 in culture-independent AGF diversity surveys has been proposed as a logical alternative for ITS1  
66 <sup>7, 14</sup>. The lack of specific AGF primers and the relatively large size of the region (approximately  
67 750 bp) has been viewed as a barrier to the wide utilization of short read, high-throughput,  
68 Illumina-based amplicon sequencing in such surveys. However, the recent development of AGF  
69 LSU-specific primers <sup>24, 31</sup>, as well as the standardization and adoption of PacBio long-read  
70 sequencing for amplicon-based diversity surveys <sup>32, 33</sup> could enable this process.

71 Theoretically, a comprehensive assessment of diversity and community structure of a  
72 host-associated lineage necessitates sampling all (or the majority) of hosts reported to harbor  
73 such lineage. However, to date, the majority of AGF diversity surveys conducted have targeted a  
74 few domesticated herbivores, e.g. cows, sheep, and goats <sup>4, 5, 34</sup>. “Exotic” animals have been  
75 sampled from zoo settings only sporadically, and on an opportunistic basis <sup>3, 35</sup>.

76 Isolation of AGF taxa enables taxonomic, metabolic, physiological, and ultrastructural  
77 characterization of individual taxa. As well, cultures availability enables subsequent –omics,  
78 synthetic and system-biology, and biogeography-based investigations <sup>36, 37, 38, 39, 40, 41, 42</sup>, as well  
79 as evaluation of evolutionary processes underpinning speciation in the AGF <sup>2, 43</sup>. However,  
80 efforts to isolate and maintain AGF strains have lagged behind their aerobic counterparts mainly  
81 due to their strict anaerobic nature and the lack of reliable long-term storage procedures. Due to  
82 these difficulties, many historic isolates are no longer available, and most culture-based studies  
83 report on the isolation of a single or few strains using a single substrate/enrichment condition  
84 from one or few hosts <sup>29, 44</sup>. Indeed, a gap currently exists between the rate of discovery (via  
85 amplicon-based diversity surveys) and the rate of isolation of new taxa of AGF, and several yet-  
86 uncultured AGF lineages have been identified in culture-independent diversity surveys <sup>17</sup>.  
87 Whether yet-uncultured AGF taxa are refractory to isolation, or simply not yet cultured due to  
88 inadequate sampling and isolation efforts remains to be seen.

89 The current study aims to expand our understanding of the diversity of AGF while  
90 addressing all three impediments described above. First, we sought to develop D1/D2 LSU as a  
91 more robust marker for AGF diversity assessment by building a reference sequence database  
92 correlating ITS1 and D1/D2 LSU sequence data from cultured strains and environmental  
93 samples. Second, we sought to expand on AGF diversity by examining a wide range of animal  
94 hosts, including multiple previously unsampled wild herbivores. Third, we sought to demonstrate  
95 the utility of intensive sampling and utilization of various isolation strategies in recovering AGF  
96 strains and testing the hypothesis that many yet-uncultured AGF lineages are indeed amenable to  
97 cultivation. Collectively, these efforts provide an established framework for future utilization of

- 98 D1/D2 LSU amplification and PacBio sequencing for AGF community assessment, highlight the
- 99 value of sampling wild herbivores, and establish the culturability of a wide range of AGF taxa.

100  
101  
102  
103  
104  
105  
106  
107  
108  
109  
110  
111  
112  
113  
114  
115  
116  
117  
118  
119  
120  
121  
122

## Results

**A reference D1/D2-LSU dataset for the Neocallimastigomycota.** A 1.4-1.5 Kbp amplicon product encompassing the ITS1-5.8S-ITS2-D1/D2 LSU region was amplified and sequenced from AGF pure cultures and environmental samples to correlate the D1/D2 LSU region to the corresponding ITS1 region, and to provide a reference D1/D2 database for future utilization in high-throughput diversity surveys. Using this approach, representative D1/D2 LSU of all the previously cultured AGF genera *Agriosomyces*, *Aklioshbomyces*, *Anaeromyces*, *Buwchfawromyces*, *Caecomyces*, *Capellomyces*, *Cyllamyces*, *Ghazallomyces*, *Joblinomyces*, *Feramyces*, *Khyollomyces*, *Liebetanzomyces*, *Neocallimastix*, *Orpinomyces*, *Pecoramyces*, *Piromyces*, and *Tahromyces* were obtained (Table 1). Representatives of the genus *Oontomyces* were not encountered in this study, but reference LSU and ITS1 sequences were obtained from prior publication<sup>26</sup>. In addition, representative sequences of D1/D2 LSU of candidate genera AL3, AL4, AL8, MN3, MN4, SK3, and SK4, previously identified in ITS1 culture-independent datasets were also obtained (Table 1, Datasets 1-3). Finally, representatives of six completely novel AGF candidate genera (RH1-RH6) were also identified (Table 1, Datasets 1-3) and confirmed as novel independent clades in ITS1 and D1/D2 LSU-based phylogenetic analysis. It should be noted that multiple previously reported yet-uncultured (candidate) genera have recently been successfully isolated, e.g. AL1 (*Khyollomyces*), AL5 (*Joblinomyces*), AL6 (*Feramyces*), AL7 (*Piromyces finnis*), MN1 (*Cyllamyces*), SP4 (*Liebetanzomyces*), and SK2 (*Buwchfawromyces*). In addition, some previously proposed candidate genera clustered as members of already existing genera in our analysis, e.g. SP8 with *Cyllamyces*, and SP6 with *Neocallimastix* (Table 1). As such, we estimate that only representatives of candidate genera BlackRhino, SP1, SP2<sup>17</sup>, and the relatively rare AL2, DA1, DT1, JH1/SP5 (ITS1 sequence

123 representatives of these two candidate genera are 99.6% similar and so they should be considered  
124 as one candidate genus), KF1, MN2, SK1, SP3, and SP7<sup>3, 5, 13, 17, 45, 46, 47, 48</sup> were not encountered  
125 in this study, and hence no reference LSU sequence data for these candidate genera are currently  
126 available (Table 1).

## 127 **D1/D2 LSU versus ITS1 as a taxonomic marker.**

### 128 *Intra-genus length variability.*

129 The ITS1 and D1/D2 LSU regions were bioinformatically extracted from the 116 Sanger-  
130 generated clone sequences from this study and previous studies<sup>23, 28, 29, 49</sup> (accession numbers in  
131 Table 1), the rRNA loci from two Neocallimastigomycota genomes (*Pecoramyces ruminantium*  
132 strain C1A, and *Neocallimastix californiae* strain G1)<sup>36, 43</sup> in which the entire *rrn* operon  
133 sequence data is available, and from the PacBio-generated environmental amplicons in this  
134 study. The ITS1 region displayed a high level of length heterogeneity, ranging in size between  
135 141 and 250 bp (median 191 bp, Figure 1a), with 75% of sequences ranging between 182-208 bp  
136 in length. Some genera had shorter than median ITS1 region length, e.g. *Cyllamyces* (range 141-  
137 173 bp), *Buwchfawromyces* (range 155-169 bp), and candidate genus AL3 (range 145-148 bp),  
138 while others exhibited a longer than median ITS1 region length, e.g. *Liebetanzomyces* (range  
139 198-225 bp), and candidate genus RH5 (range 191-224 bp) (Figure 1a). A third group of genera  
140 displayed a wide range of length heterogeneity, e.g. *Neocallimastix* (range 160-244 bp),  
141 *Caecomyces* (range 192-250), and *Piromyces* (range 173-225 bp). Few genera and candidate  
142 genera displayed a fairly narrow range of ITS1 length, e.g. AL3 (141-148 bp), but this is  
143 potentially a reflection of the paucity of sequences belonging to these genera obtained in this  
144 study (Figure 1a).



145 On the other hand, a much lower level of length heterogeneity was identified in the  
146 D1/D2 LSU (Figure 1b), ranging in size between 740-767 bp (median 760 bp), and where 75%  
147 of the sequences ranged between 757-761 bp, with all genera consistently displaying a much  
148 narrower D1/D2-LSU length heterogeneity, ranging between 11 bp in RH4 and 26 bp in the  
149 genera *Neocallimastix* and *Aklioshbomyces*.

#### 150 ***Intra-genus sequence divergence.***

151 The ITS1 region displayed intra-genus sequence divergence ranging from 0.4 to 21% (median  
152 3.2%), with 75% of the pairwise divergence values ranging between 1.7-6%. Genera displaying  
153 the highest level of divergence were *Caecomycetes* (1-18.9%, median 8.3%), *Cyllamyces* (0.6-  
154 19.6%, median 5.5%), and *Neocallimastix* (0.4-19.3%, median 5.5%) (Figure 1c). On the other  
155 hand, intra-genus sequence divergence of the D1/D2 LSU ranged between 0.1-9.2% (median  
156 1.4%), with 75% of the pairwise divergence values ranging between 0.8-2.1%. Genera  
157 displaying highest level of divergence were *Feramyces* (0.1-7.8%), *Joblinomyces* (0.1-8.7%),  
158 *Caecomycetes* (0.1-9%), and *Piromyces* (0.1-9.2%) (Figure 1d).

#### 159 ***Within strain length variability.***

160 Within strain length heterogeneity examined in 19 strains with 2 or more sequenced clones  
161 ranged between 0-5 bp (Figure 2a) for ITS1 region and 0-1 bp for the LSU region (Figure 2b).

#### 162 ***Within strain sequence divergence.***

163 Examining the 19 strains with more than two sequenced clones, the full ITS1 region showed  
164 intra-strain sequence divergence ranging from 0.1-10.01% (Figure 2c). Similar, and even higher  
165 levels of intra-strain ITS1 variability was previously reported e.g. up to 12.9% in  
166 *Buwchfawromyces eastonii* strain GE09<sup>15</sup>. On the other hand, within strain D1/D2 LSU rRNA  
167 region showed a much lower sequence divergence, ranging from 0.13-1.84% (Figure 2d).

168 **Neocallimastigomycota diversity assessment using D1/D2 LSU as a phylogenetic marker.**

169 ***Phylogenetic diversity and Novelty.***

170 A total of 17,697 high-quality long-read amplicons were obtained. Phylogenetic analysis using  
171 the D1/D2 LSU amplicons assigned all sequences into 28 different genera/candidate genera  
172 (Figure 3a, Figure 4a, Figure S1) and 298 species level OTU<sub>S0.02</sub>. AGF genera identified in this  
173 study included members of the previously described genera *Anaeromyces*, *Buwchfawromyces*,  
174 *Caecomyces*, *Cyllamyces*, *Liebetanzomyces*, *Neocallimastix*, *Orpinomyces*, *Pecoramyces*, and  
175 *Piromyces*. In addition, sequences representing multiple novel genera were also identified  
176 (Figure 3a, Figure 4a, Figure S1), some of which have been subsequently isolated, named, and  
177 characterized in separate publications, e.g. *Feramyces*<sup>28</sup>, *Aklioshbomyces*, *Agriosomyces*,  
178 *Ghazallomyces*, and *Khyollomyces*<sup>50</sup>. Finally, six novel candidate genera were identified and  
179 designated RH1-RH6 (Figure 3a, Figure 4a, Figure S1). All of these six novel genera were  
180 encountered in extremely low abundance in a few samples (Figure 3a), with the notable  
181 exception of RH5, which was present in high relative abundance in multiple animals e.g.  
182 domesticated sheep (96.22%), blackbuck deer (52.41%), axis deer (20.71%), and an aoudad  
183 sheep sample (11.75%).

184 ***Diversity estimates, and distribution patterns.***

185 The number of AGF genera encountered per sample varied widely from 5 (in Pere David's deer,  
186 and Longhorn cattle) to 16 (in one Aoudad sheep sample) (Table 2, Figure 3a, Figure 4a).  
187 However, in each of these samples a distribution pattern was observed in which a few genera  
188 represent the absolute majority of the sequences obtained. Excluding genera present in less than  
189 1% abundance would lower the number of genera encountered per animal to 1 (in white-tail deer

190 and dwarf goat) -10 (domesticated goat). Usually, 1-5 taxa were present in >10% abundance per  
191 animal (Figure 3b).

192 Using empirical cutoffs for ubiquity (presence in at least 50% of the animals studied) and  
193 abundance (above 1%), we identify five different distribution patterns for AGF genera  
194 encountered in this study (Figure 4b); 1. Ubiquitous mostly abundant genera: These are the  
195 genera identified in at least 50% of the animals studied and where their relative abundances  
196 exceed 1% in at least 50% of their hosts: This group includes *Piromyces*, *Feramyces*,  
197 *Khyollomyces*, RH5, *Neocallimastix*, *Cyllamyces*, and *Caecomyces*. 2. Ubiquitous mostly rare  
198 genera: These are the genera identified in at least 50% of the animals studied and where their  
199 relative abundances were lower than 1% in at least 50% of their hosts. This group includes  
200 *Orpinomyces*, and *Pecoramyces*. 3. Less ubiquitous but mostly abundant genera: These are the  
201 genera identified in < 50% of the animals studied but where their relative abundances exceed 1%  
202 in at least 50% of their hosts. This group includes *Ghazallomyces*, RH4, MN4, *Joblinomyces*,  
203 SK4, *Buwchfawromyces*, AL3, RH1, and RH3. 4. Less ubiquitous mostly rare genera: These are  
204 the genera identified in < 50% of the animals and where their relative abundances were lower  
205 than 1% in at least 50% of their hosts. This group includes *Liebetanzomyces*, *Anaeromyces*, AL8,  
206 *Aklioshbomyces*, RH2, and *Agriosomyces*. 5. Less ubiquitous consistently rare genera: These are  
207 the genera identified in < 50% of the animals and where their relative abundances never  
208 exceeded 1% in any of their hosts. This group includes RH6, AL4, MN3, and SK3.

209 Multiple diversity estimates (number of observed genera, Chao and Ace richness  
210 estimates, Shannon diversity index, Simpson evenness, as well as diversity rankings) were  
211 computed for each sample (Table 2). The highest genus-level richness was observed in aoudad  
212 sheep, dwarf goat, oryx, domesticated cow, domesticated goat, miniature donkey, zebra, and

213 blackbuck deer samples, while the highest genus-level diversity (based on diversity ranking and  
214 Shannon index) was observed in domesticated goat, alpaca, axis deer, blackbuck deer, mouflon  
215 ram, miniature donkey, oryx, and domesticated horse. On the other hand, the lowest genus-level  
216 richness was observed in longhorn cattle, Pere David's deer, Boer goat, domesticated horse,  
217 domesticated sheep, and alpaca, while the lowest genus-level diversity was observed in Fallow  
218 deer, zebra, domesticated sheep, dwarf goat, and white-tail deer.

219 When correlated to animal host phylogeny or animal lifestyle (24 possible combinations),  
220 all diversity estimates showed low correlation coefficients (Cramer's V statistic <0.49) at both  
221 the genus and the species equivalent levels (Table S1). Student t-tests were used to examine the  
222 significance of the difference in diversity estimates at the genus and species equivalent levels  
223 between animal host families (families Bovidae, Cervidae, and Equidae) as well as animal  
224 lifestyle (zoo-housed, wild, and domesticated). Only three of these showed a significant  
225 difference (Student t-test p-value <0.05): Family Bovidae had a significantly higher observed  
226 number of genera and significantly higher Chao estimate at the genus level, and zoo-housed  
227 animals had significantly lower Shannon diversity at the species equivalent level (Table S1).

### 228 ***Community structure.***

229 We used a combination of ordination methods and Student t tests to identify associations  
230 between AGF genera and host factors. Non-metric multidimensional scaling based on the genus-  
231 level Bray-Curtis indices (Figure 5a-b) identified a few patterns. The genera *Aklioshbomyces*,  
232 *Ghazallomyces*, *Joblinomyces*, *Feramyces*, *Buwchfawromyces*, and *Pecoramycetes* seem to be  
233 more prevalent in some wild animals (e.g. black buck deer, mouflon, oryx, axis deer, and white  
234 tailed deer; filled squares in Figure 5a), while some zoo-housed animals (e.g. elk, dwarf goat,  
235 and miniature donkey; grey squares in Figure 5a) clustered together based on the abundance of

236 *Neocallimastix*, *Caecomyces*, and *Liebetanzomyces*. Few domesticated animals (e.g.  
237 domesticated goat, longhorn, alpaca, and domesticated cow; open squares in Figure 5a) clustered  
238 together based on the abundance of *Cyllamyces*, AL8, MN3, MN4, RH1, RH3, RH4, and RH6.  
239 Animal host family had a slightly less apparent effect on AGF community structure (Figure 5b)  
240 with the exception of the importance of *Aklioshbomyces* and *Ghazallomyces* in family Cervidae,  
241 and AL3 and *Khyollomyces* in family Equidae.

242 To test the significance of these observed patterns, Student t-tests were used to identify  
243 significant associations between specific AGF taxa and host phylogeny (families Bovidae,  
244 Equidae, Cervidae), or animal lifestyle (zoo-housed, domesticated, wild). From all possible  
245 associations (168 total; 28 genera x 3 host families and 3 lifestyles), significant differences were  
246 observed only in the following cases. The AGF genera AL3, *Khyollomyces*, and *Piromyces* were  
247 significantly more abundant in family Equidae (p-value=0.014, 0.018, and 0.034 respectively),  
248 while the genera *Aklioshbomyces*, *Ghazallomyces*, and *Joblinomyces* were significantly more  
249 abundant in family Cervidae (p-value=0.074, 0.072, and 0.075 respectively). On the other hand,  
250 the animal lifestyle had slightly more significant effect on AGF community structure as follows:  
251 The genus *Neocallimastix* was significantly more abundant in zoo-housed animals (p-  
252 value=0.007), the genera *Aklioshbomyces*, *Buwchfawromyces*, and *Pecoromyces* were  
253 significantly more abundant in wild animals (p-value=0.047, 0.028, and 0.014 respectively), and  
254 the genera *Cyllamyces*, AL8, RH1, RH4, and RH6 were significantly more abundant in  
255 domesticated animals (p-value=0.001, 0.001, 0.011, 0.018, and 0.054 respectively). Finally, for  
256 individual animals species with enough replication in our study, the genera *Cyllamyces*, AL8,  
257 and RH1 were significantly more abundant in *Bos taurus* (p-values=1.86E-11, 3E-5, and 2.27E-  
258 9, respectively), the genera *Caecomyces* and RH5 were significantly more abundant in *Ovis aries*

259 (p-values=0.006, and 0.004 respectively), and the genera *Feramyces* and SK4 were significantly  
260 more abundant in *Ammotragus lervia* (p-values=0.002, and 0.0006, respectively). Further, some  
261 genera were only encountered in one animal, demonstrating a probable strong AGF genus-host  
262 preference. These genera include *Ghazallomyces* only encountered in axis deer, AL4 only  
263 encountered in domesticated sheep, MN3 only encountered in domesticated cow, and MN4 only  
264 encountered in domesticated goat.

### 265 **Neocallimastigomycota isolation**

266 A total of 216 AGF isolates were obtained from 21 animals (Table 3). Success in isolation and  
267 maintenance of that large number of isolates was enabled by the implementation of various  
268 techniques for isolation, and the development of a reliable storage procedure<sup>51</sup>. Isolates obtained  
269 belonged to 12 different genera (Table 3), six of which were exclusively isolated in this study,  
270 and characterized in separate publications (*Akhlioshbomyces*, *Ghazallomyces*, *Capellomyces*,  
271 *Agriosomyces*, *Khoyollomyces* (AL1), and *Feramyces* (AL6)<sup>28,50</sup>. In general, 1-3 AGF genera  
272 were isolated per sample. Isolation efforts captured anywhere between 6.3% (1 of 16 genera) to  
273 27.3% (3 of 11 genera) of AGF genera identified in a single sample using culture-independent  
274 D1/D2 LSU gene-based analysis. However, these values are highly affected by the fact that  
275 sequencing efforts are capable of identification of AGF genera present in extremely low levels of  
276 relative abundance. Indeed, excluding rare taxa (those present at <1% abundance), the  
277 culturability goes up to 10% (1 of 10 genera)-100% (2 of 2 genera).

278 We sought to determine how community structure and isolation efforts correlate, and  
279 whether obtaining isolates belonging to a specific genus could be predicted from the community  
280 structure of the sample. We observed a strong Pearson correlation ( $r=0.79$ ) between the  
281 abundance of a certain genus in a sample and the frequency of its isolation. On the other hand,

282 the success of isolation of the most dominant member of the community was negatively affected  
283 by the sample evenness (Pearson correlation coefficient = -0.87). Indeed, our ability to isolate the  
284 novel genera *Aklioshbmyces*, *Ghazallomycota*, and *Khyollomyces* could be attributed to their  
285 presence in high relative abundance in samples from which they were recovered (Table 3), as  
286 opposed to their rarity/absence in other samples (Figure 3, 4). Within ubiquitous genera, we  
287 observed that the abundance-success of isolation correlation described above is stronger for  
288 monocentric taxa (Pearson correlation coefficients= 0.83, 0.96, 0.92, and 1 for *Pecoromyces*,  
289 *Feromyces*, *Neocallimastix*, and *Agriosomyces*, respectively), while such relationship was much  
290 weaker in polycentric taxa (Pearson correlation coefficients= 0.31, and 0.58 for *Orpinomyces*,  
291 and *Anaeromyces*, respectively). However, the polycentric nature of these genera (ability to  
292 propagate even in the absence of zoospore production, and the larger colony size on roll tubes)  
293 enabled their isolation even when they constituted a minor fraction of the total community.

294  
295  
296  
297  
298  
299  
300  
301  
302  
303  
304  
305  
306  
307  
308  
309  
310  
311  
312  
313  
314  
315

## Discussion

**LSU as a phylogenetic marker for AGF diversity surveys.** We highlight and quantify the advantages associated with the utilization of D1/D2 LSU as a phylomarker for the AGF when compared to the currently utilized ITS1 region (Figures 1, 2). We also report on overcoming the three main hurdles (lack of reference sequences from uncultured genera, correlating D1/D2 LSU data to currently available ITS1 datasets, and amplicon length precluding utilization of Illumina platform) associated with D1/D2 LSU use as a phylomarker. To address the lack of reference LSU sequence data, we undertook a multi-year isolation effort to provide a comprehensive D1/D2-LSU database from a wide range of AGF taxa, a necessary approach given the lack of LSU sequence data from multiple historic taxa, unavailability of AGF in culture collections, and difficulties in maintenance of this fastidious group of organisms. To correlate D1/D2 LSU data to currently available ITS1 datasets and overcome amplicon length constrains, we utilized a SMRT-PacBio sequencing approach to obtain sequences comprising the region spanning from the start of the ITS1 region to the end of the D1/D2-LSU region in the rRNA locus (1400-1500 bp). In the process, we not only increased the representation of D1/D2-LSU sequences from all cultured taxa, but also identified D1/D2-LSU sequences of yet-uncultured taxa previously defined only by their ITS1 sequences (e.g. AL3, AL4, AL8, MN3, MN4, SK3, and SK4), as well as defined 6 completely novel AGF candidate genera (RH1-RH6). Collectively, this dataset (17,697 sequences of environmental D1/D2 LSU annotated by their taxonomy (Dataset 3), plus 116 Sanger-generated clone sequences and genomic rRNA loci sequences (Table 1 with accession numbers) could pave the way for future D1/D2 LSU-based AGF diversity surveys. We anticipate that additional sampling and culture-independent studies using the whole region, as



316 well as future isolation efforts will identify the corresponding D1/D2-LSU region for those few  
317 yet-uncultured ITS1-defined lineages that we failed to capture in our study.

318         Single molecule real-time (SMRT) PacBio sequencing technology enables long read  
319 sequencing by a single uninterrupted DNA polymerase molecule. The SMRT sequencing  
320 protocol involves ligating hairpin adaptors to the ends of double-stranded DNA (PCR products in  
321 the case of culture-independent studies), leading to the circularization of the DNA. This  
322 subsequently allows the sequencing polymerase to pass around the molecule multiple times. The  
323 re-sequencing by multiple passages increases sequence coverage thereby significantly reducing  
324 error rates from initial values of up to 15%, to levels lower than 1%. Culture-independent studies  
325 in bacteria, archaea, and fungi<sup>33, 52, 53, 54</sup> have successfully applied the technology. We, here,  
326 provide the basis for its application to culture-independent studies in anaerobic gut fungi. We  
327 applied rigorous control to ensure the high quality of reads utilized to build the single molecule  
328 consensus read sequences (by using a minimum threshold of 5 full passes and 99.95% predicted  
329 accuracy), followed by pre-processing in Mothur to remove sequences with ambiguities or an  
330 average quality score below 25. Also, we anticipate that future AGF diversity studies employing  
331 PacBio sequencing of the D1/D2-LSU region (rather than the full ITS1-5.8S-ITS2-D1/D2 LSU  
332 region) would be further enabled by the shorter amplicon length (~700 as opposed to ~1300-  
333 1400 bp), as well as recent (e.g. Sequel II) and future anticipated improvements in SMRT  
334 sequencing technology.

335 **Discovery and characterization of novel AGF lineages.** D1/D2 LSU-based diversity  
336 assessment of 21 fecal samples identified multiple novel AGF candidate genera (Figure 3, 4),  
337 five of which were subsequently isolated and described in separate publications (*Feramyces*<sup>28</sup>,  
338 *Aklioshbomyces*, *Agriosomyces*, *Ghazallomyces*, and *Khyollomyces*<sup>50</sup>). These results clearly

339 demonstrate that the scope of AGF diversity is much broader than implied from prior studies.  
340 This conclusion is in apparent disagreement with the recent work of Paul et al.<sup>17</sup>, where the  
341 authors utilized a rarefaction-based approach on publicly available ITS1 AGF sequence data to  
342 suggest that AGF sampling efforts have reached saturation. However, we argue that using a  
343 rarefaction curve approach on publicly available datasets only elucidates coverage within  
344 samples already in the database, and not the broader AGF diversity in nature. Many prior studies  
345 have used relatively low throughput sequencing technologies, and repeatedly sampled few  
346 domesticated animals, and such pattern would result in encountering highly similar populations  
347 between different studies. We attribute the discovery and characterization of a wide range of  
348 novel AGF taxa within our dataset to sampling previously unsampled animal hosts, and the use  
349 of high-throughput sequencing that enabled access to rare members of the AGF community.  
350 Multiple novel AGF genera were isolated from animals previously unsampled for AGF diversity,  
351 e.g. *Aklioshbomyces* from white-tailed deer where it represented 98.5% of the community,  
352 *Ghazallomyces* from axis deer where it represented 27.8% of the community, and *Feramyces*  
353 from an aoudad sheep sample where it represented 55.3% of the community. It is notable that  
354 many of these novel taxa were only encountered in wild herbivores. Whether this novelty is a  
355 reflection of a lifestyle selecting for specific taxa, or a reflection of simply lack of prior sampling  
356 of wild animals due to logistic difficulties remains to be seen. This clearly demonstrates that  
357 novel AGF taxa remain to be discovered by sampling hitherto unsampled/poorly sampled animal  
358 hosts.

359 Further, a significant fraction of novel AGF candidate genera identified were present in  
360 extremely low relative abundance. Such pattern suggests the presence of numerous novel AGF  
361 taxa that appear to predominantly exist in relatively low abundance possibly as dormant

362 members of the AGF community in the herbivorous gut. The discovery and characterization of  
363 the rare members of AGF community could significantly expand the scope of AGF diversity in  
364 nature. The dynamics, rationale for occurrence, mechanisms of maintenance, putative role in  
365 ecosystems, and evolutionary history of rare members of the community are currently unclear. It  
366 has been suggested that a fraction of the rare biosphere could act as a seed bank of functional  
367 redundancy that aids in ecosystem response to periodic (e.g. occurring as part of growth of the  
368 animal host, or due to seasonal changes in feed types) or occasional (i.e. due to unexpected  
369 disturbances) changes in the gut *in-situ* conditions. Regardless, such pattern highlights the value  
370 of deeper sampling (to capture rare biosphere), as well as more extensive time-series, rather than  
371 snapshot, sampling to capture patterns of promotion and demotion of members of the AGF  
372 community within the lifespan of an animal.

373 **The value of AGF isolation efforts.** The strict anaerobic nature of AGF necessitates the  
374 implementation of special techniques for their isolation and maintenance<sup>55,56</sup>. Further, while  
375 several storage methods based on cryopreservation have been proposed<sup>57</sup>, the decrease in  
376 temperature to the ultra-low values and the incidental O<sub>2</sub> exposure during revival of the  
377 cryopreserved strains were shown before to be detrimental for some isolates. The lack of reliable  
378 long-term storage procedures often necessitates frequent subculturing of strains (every 3-4 days),  
379 which often leads to either the production of sporangia that do not differentiate to zoospores, or  
380 the outright failure to produce sporangia<sup>58</sup>.

381 Through a multi-year effort, we were successful in obtaining 216 isolates representing  
382 twelve AGF genera. We attribute our success to using multiple strategies (enrichment on  
383 multiple carbon sources, and paying special attention to picking colonies of different shapes and  
384 sizes, and to picking several colonies of the same shape, as representatives of different genera are

385 known to produce colonies with very similar macroscopic features), but, more importantly, to  
386 using a wide range of samples (with varying host lifestyle, gut type, and animal phylogeny). The  
387 success of isolation of a certain genus was, in general, attributed to its abundance in the sample  
388 (Pearson correlation coefficient=0.79), especially for monocentric genera (e.g. *Pecoramyces*,  
389 *Feramyces*, *Neocallimastix*, and *Agriosomyces*), and was negatively correlated to the sample  
390 evenness (Pearson correlation coefficient= -0.87). It remains to be seen if this is true and  
391 reproducible for all samples and across laboratories. More efforts are certainly needed to develop  
392 targeted isolation strategies for specific taxa that we failed to obtain in pure cultures despite our  
393 best effort and despite their abundance in their respective sample (e.g. SK4 in one of the aoudad  
394 sheep samples, and RH5 in the domesticated sheep and the axis deer samples).

395 In conclusion, our results establish the utility of D1/D2 LSU and PacBio sequencing for  
396 AGF diversity surveys, and the culturability of a wide range of AGF taxa, and demonstrate that  
397 wild herbivores represent a yet-untapped reservoir of AGF diversity.

398

## Experimental Procedures

399 **Samples.** Fecal Samples were obtained from six domesticated, six zoo-housed, and nine wild  
400 animals (Table 2). The host animals belonged to the families *Bovidae* (11), *Cervidae* (6),  
401 *Equidae* (3), and *Camelidae* (1). The dataset encompassed some replicates from few animal  
402 species sometimes with lifestyle variations within a single animal species: *Bos taurus* (n=2;  
403 domesticated cow, and domesticated longhorn cattle), *Ovis aries* (n=2; domesticated sheep and  
404 wild mouflon ram), *Capra aegagrus* (n=3; domesticated goat, wild Boer goat, and zoo-housed  
405 dwarf goat), and *Ammotragus lervia* (n=2; Aoudad Sheep) (Table 2). Samples from domesticated  
406 animals were obtained from Oklahoma State University and surrounding farms between  
407 September 2016 and May 2018. Samples from the Oklahoma City Zoo were obtained in April  
408 2019. For samples from wild herbivores, we enlisted the help of hunters in four separate hunting  
409 expeditions in Sutton, Val Verde, and Coke counties, Texas (April 2017, July 2017, and April  
410 2018), and Payne County, Oklahoma (October 2017). Appropriate hunting licenses were  
411 obtained and the animals were shot either on private land with the owner's consent or on public  
412 land during the hunting season. All samples were stored on ice and promptly (within 20 minutes  
413 for domesticated samples, within 1 hour for zoo samples, and within 24 hours for samples  
414 obtained during hunting trips) transferred to the laboratory. Upon arrival, a portion of the sample  
415 was immediately used for setting enrichments for isolation efforts, while the rest was stored at -  
416 20°C for DNA extraction.

### 417 **Development of D1/D2 LSU locus as a phylogenetic marker.**

418 *A. Amplification of the ITS1-5.8S rRNA-ITS2-D1/D2 LSU from Neocallimastigomycota isolates.*  
419 Biomass was harvested from 10 ml of 2-4-day old cultures and crushed in liquid nitrogen. DNA  
420 was extracted from the ground fungal biomass using DNeasy PowerPlant Pro Kit (Qiagen,

421 Germantown, Maryland) according to the manufacturer's instructions (Youssef et al. 2013). A  
422 PCR reaction targeting the region encompassing ITS1, 5.8S rRNA, ITS2, and D1/D2 region of  
423 the LSU rRNA' (Figure 6) was conducted using the primers ITS5-NL4<sup>23</sup>. The PCR protocol  
424 consisted of an initial denaturation for 5 min at 95 °C followed by 40 cycles of denaturation at  
425 95 °C for 1 min, annealing at 55 °C for 1 min and elongation at 72 °C for 2 min, and a final  
426 extension of 72 °C for 20 min. PCR amplicons were purified using PureLink® PCR cleanup kit  
427 (Life Technologies, Carlsbad, California), followed by cloning into a TOPO-TA cloning vector  
428 according to the manufacturer's instructions (Life Technologies, Carlsbad, California). Clones  
429 (n=1-12 per isolate) were Sanger sequenced at the Oklahoma State University DNA sequencing  
430 core facility.

431 *B. Amplification of the ITS1-5.8S-ITS2-D1/D2 LSU from environmental samples.* Fecal material  
432 from different animals (0.25-0.5 g) were crushed in liquid nitrogen and total DNA was extracted  
433 from the ground sample using DNeasy PowerPlant Pro Kit (Qiagen, Germantown, Maryland)  
434 according to the manufacturer's instructions (Youssef et al. 2013). Extracted DNA was then used  
435 as a template for ITS1-5.8S-ITS2-D1/D2 LSU PCR amplification using ITS5 forward primer and  
436 the AGF-specific reverse primer GG-NL4<sup>24</sup>. Primers were barcoded to allow PacBio sequencing  
437 and multiplexing (Table S2). Amplicons were purified using PureLink® PCR cleanup kit (Life  
438 Technologies, Carlsbad, California), quantified using Qubit® (Life Technologies, Carlsbad,  
439 California), pooled, and sequenced at Washington State University core facility using one cell of  
440 the single molecular real time (SMRT) Pacific Biosciences (PacBio) RSII system.

441 *C. Environmental PacBio-generated sequences quality control.* We performed a two-tier quality  
442 control protocol on the generated sequences. First, the raw reads were processed according to  
443 PacBio published protocols to obtain single molecule consensus reads. Second, we used rigorous

444 sequence quality control in Mothur<sup>59</sup> to remove any sequences with low quality from subsequent  
445 analysis.

446 For Raw reads processing, the official PacBio pipeline (RS\_Subreads.1)  
447 ([http://files.pacb.com/software/smrtanalysis/2.2.0/doc/smrtportal/help/!SSL!/Webhelp/CS\\_Prot\\_](http://files.pacb.com/software/smrtanalysis/2.2.0/doc/smrtportal/help/!SSL!/Webhelp/CS_Prot_RS_Subreads.htm)  
448 [RS\\_Subreads.htm](http://files.pacb.com/software/smrtanalysis/2.2.0/doc/smrtportal/help/!SSL!/Webhelp/CS_Prot_RS_Subreads.htm)) was utilized. Raw reads were filtered based on the minimum read length and  
449 minimum read quality. The passing reads were then processed with the PacBio  
450 RS\_ReadsOfInsert protocol  
451 ([http://files.pacb.com/software/smrtanalysis/2.2.0/doc/smrtportal/help/!SSL!/Webhelp/CS\\_Prot\\_](http://files.pacb.com/software/smrtanalysis/2.2.0/doc/smrtportal/help/!SSL!/Webhelp/CS_Prot_RS_ReadsOfInsert.htm)  
452 [RS\\_ReadsOfInsert.htm](http://files.pacb.com/software/smrtanalysis/2.2.0/doc/smrtportal/help/!SSL!/Webhelp/CS_Prot_RS_ReadsOfInsert.htm)) for generating single-molecule consensus reads from the insert template.  
453 Consensus reads had a minimum of 5 full passes, 99.95% predicted accuracy, and 1000 bp insert  
454 length. The resulting consensus reads had a mean number of passes of 20, mean read length of  
455 insert of 1429 bp, and mean polymerase read quality of 0.99.

456 Sequence quality control procedures were subsequently conducted in Mothur<sup>59</sup> to assess  
457 the quality of the generated consensus reads utilizing stringent protocols previously suggested for  
458 assessing bacterial, archaeal, and fungal diversity for similar sized amplicons<sup>33, 52, 53, 54</sup>. Reads  
459 were filtered in Mothur using trim.seqs to remove reads longer than 2000 bp, reads with average  
460 quality score below 25, reads with ambiguous bases, reads not containing the correct barcode  
461 sequence, reads with more than 2 bp difference in the primer sequence, and reads with  
462 homopolymer stretches longer than 12 bp. Reads with the primer sequence in the middle were  
463 identified by performing a standalone Blastn-short using the primer sequence as the query, and  
464 were subsequently removed using the remove.seqs command in Mothur.

465 A mock community (constituted of equal concentration of PCR products of 5 different  
466 strains (*Aklioshbomyces papillarum* strain WT2, *Feramyces austinii* isolate DS10,

467 *Liebetanzomyces* sp. isolate Cel1A, *Piromyces* sp. isolate A1, and *Piromyces* sp. isolate Jen1)  
468 from our culture collection and for which we have obtained at least 5 Sanger clone sequences)  
469 was also sequenced. To establish whether the above approaches for overall read- and sequence-  
470 based quality control are adequate, we compared PacBio-generated mock sequences to the  
471 corresponding Sanger-generated clone sequences. The median percentage similarity between  
472 PacBio-generated sequences affiliated with a certain strain and the Sanger-generated clone  
473 sequences obtained for that strain ( $99.05\pm 0.6$  to  $99.64\pm 0.47$ ) were not significantly different  
474 from the median percentage similarities between different clones of the same strain ( $98.91\pm 0.6$  to  
475  $99.72\pm 0.47$ ) (Student t-test  $p$ -value $>0.1$ ) attesting to the adequacy of the above quality control  
476 measures in removing low quality sequences.

477 *D. A D1/D2 LSU reference database for cultured and yet-uncultured AGF taxa.* A reference  
478 D1/D2-LSU sequence database for all Neocallimastigomycota cultured genera present in our  
479 culture collection was created via amplification, cloning, and sequencing of the ITS1-5.8S-ITS2-  
480 D1/D2 LSU allowing for a direct correlation and cross-referencing of both regions. To obtain  
481 D1/D2 LSU sequences representing yet-uncultured candidate genera previously defined by ITS1  
482 sequence data <sup>3, 5, 13, 17, 46</sup>, the ITS1 region from the PacBio-generated ITS1-5.8S-ITS2-D1/D2  
483 LSU environmental amplicons was extracted in Mothur using the pcr.seqs command with the  
484 sequence of the MNGM2 reverse primer and the flag rdiffs=2 to allow for 2 differences in primer  
485 sequence. The trimmed sequences corresponding to the ITS1 region were compared, using  
486 blastn, to a manually curated Neocallimastigomycota ITS1 database encompassing all known  
487 cultured genera, as well as yet-uncultured taxa previously identified in culture-independent  
488 studies <sup>3, 5, 13, 17, 46</sup> (Figure 6). Sequences were classified as their first hit taxonomy if the  
489 percentage similarity to the first hit was  $>96\%$  and the two sequences were aligned over  $>70\%$  of



490 the query sequence length. A taxonomy file was then created that contained the name of each  
491 sequence in the PacBio-generated environmental dataset and its corresponding taxonomy and  
492 was used for assigning taxonomy to the D1/D2 LSU sequence data.

493 *E. Comparison of D1/D2-LSU versus ITS1 as phylogenetic markers.* We used the dataset of full  
494 length PacBio-generated sequences described above, in addition to 116 Sanger-generated clone  
495 sequences from this study and previous studies<sup>23, 28, 29, 49</sup>, as well as genomic rRNA loci from  
496 two Neocallimastigomycota genomes (*Pecoramyces ruminantium* strain C1A, and  
497 *Neocallimastix californiae* strain G1)<sup>36, 43</sup> in which the entire rrn operon sequence data is  
498 available to compare the ITS1 and D1/D2-LSU regions with respect to heterogeneity in length  
499 and intra-genus sequence divergence. For every sequence, the ITS1, and the D1/D2-LSU regions  
500 were bioinformatically extracted in Mothur using the pcr.seqs command (with the reverse primer  
501 MNGM2, and the forward primer NL1, for the ITS1, and the D1/D2-LSU regions, respectively)  
502 and allowing for two differences in the primer sequence. The trimmed sequences (both ITS1 and  
503 D1/D2-LSU) were then sorted into files based on their taxonomy such that for each genus/taxon  
504 two fasta files were created, an ITS1 and a D1/D2-LSU. These fasta files were then used to  
505 compare length heterogeneity, and intra-genus sequence divergence as follows. Sequences  
506 lengths in each fasta file were obtained using the summary.seqs command in Mothur. Intra-genus  
507 sequence divergence values were obtained by first creating a multiple sequence alignment using  
508 the MAFFT aligner<sup>60</sup>, followed by generating a sequence divergence distance matrix using the  
509 dist.seqs command in Mothur. Box plots for the distribution of length and sequence divergence  
510 were created in R.

511 **AGF Diversity assessment using D1/D2 LSU locus.**

512 *A. Phylogenetic placement.* The majority of the D1/D2-LSU sequences bioinformatically  
513 extracted from environmental sequences were assigned to an AGF genus as described above.  
514 D1/D2-LSU sequences that could not be confidently assigned to an AGF genus were  
515 sequentially inserted into a reference LSU tree to assess novelty. Further, the associated ITS1  
516 sequences (obtained from the same amplicon) were similarly inserted into a reference ITS1 tree  
517 for confirmation. Sequences were assigned to a novel candidate genus when both loci (LSU and  
518 ITS1) cluster as novel, independent genus-level clades with high (>70%) bootstrap support in  
519 both trees.

520 *B. Genus and species level delineation.* Genus level assignments were conducted via a  
521 combination of similarity search and phylogenetic placement as described above. We chose not  
522 to depend on sequence divergence cutoffs for OTU delineation at the genus level since some  
523 genera exhibit high sequence similarity between their D1/D2-LSU sequences (e.g.  
524 *Liebetanzomyces*, *Capellomyces*, and *Anaeromyces* D1/D2-LSU sequence divergence ranges  
525 between 1.8-2.5%), while other genera are highly divergent (e.g. *Piromyces* intra-genus sequence  
526 divergence cutoff of the D1/D2-LSU region ranges between 0-5.7%), and as such “a one size fits  
527 all” approach should not be applied. On the other hand, a similar approach for OTUs delineation  
528 at the species equivalent level is problematic due to uncertainties in circumscribing species  
529 boundaries, and inadequate numbers of species representatives in many genera. Therefore, for  
530 OTU delineation at the species equivalent level, we reverted to using a sequence divergence  
531 cutoff. Historically, cutoffs of 3%<sup>16</sup> to 5%<sup>3</sup> were used for ITS1-based species equivalent  
532 delineation. However, D1/D2-LSU sequence data are more conserved when compared to LSU  
533 data in the Neocallimastigomycota<sup>15, 26, 27, 28, 29, 30, 50</sup>, as well as other fungi<sup>19</sup>. To obtain an  
534 appropriate species equivalent cutoff, we used the 116 Sanger-generated clone sequences from

535 this study and previous studies <sup>23, 28, 29, 49</sup>, as well as genomic rRNA loci from two  
536 Neocallimastigomycota genomes where the entire ribosomal operon sequence is available  
537 (*Pecoramyces ruminantium* strain C1A, and *Neocallimastix californiae* strain G1) <sup>36, 43</sup>. The  
538 ITS1 and D1/D2-LSU regions were bioinformatically extracted and sorted to separate fasta files.  
539 Sequences in each file were then aligned using MAFFT <sup>60</sup> and the alignment was used to create a  
540 distance matrix for every possible pairwise comparison using dist.seqs command in Mothur. The  
541 obtained pairwise distances for the ITS1, and the D1/D2-LSU regions were then correlated to  
542 obtain values of D1/D2-LSU sequence divergence cutoffs corresponding to the 3-5% range in  
543 ITS1. This was equivalent to 2.0-2.2%, and hence, for this study, a cutoff of 2% was used for  
544 OTU generation at the species equivalent level using the D1/D2-LSU region.

545 *C. Diversity and community structure assessments.* Genus and species equivalent OTUs  
546 generated as described above were used to calculate alpha diversity indices (Chao and Ace  
547 richness estimates, Shannon diversity index, Simpson evenness index) for the different samples  
548 studied using the summary.seqs command in Mothur. A shared OTUs file created in Mothur  
549 using the make.shared command was used to calculate Bray-Curtis beta diversity indices  
550 between different samples (using the summary.shared command in Mothur). The shared OTUs  
551 file was also used as a starting point for ranking the samples based on their diversity using both  
552 an information-related diversity ordering method (Renyi generalized entropy), and an expected  
553 number of species-related diversity ordering method (Hulbert family of diversity indices) (Table  
554 2). For community structure visualization, Bray Curtis indices at the genus level were also used  
555 to perform non-metric multidimensional scaling using the metaMDS function in the Vegan  
556 package in R. Also, the percentage abundance of different genera across the samples studied  
557 were used in principal components analysis using the prcomp function in the labdsv package in

558 R. Ordination plots were generated from the two analyses (NMDS and PCA) using the ordiplot  
559 function.

560 *D. Statistical analysis:* Correlations of the diversity estimates to animal host factors including the  
561 animal lifestyle (domesticated, zoo-housed, wild), and the animal host families (Bovidae,  
562 Cervidae, Equidae, Camelidae) were calculated using  $\chi^2$ -contingency tables followed by  
563 measuring the degree of association using Cramer's V statistics as detailed before<sup>3</sup>. In addition,  
564 to identify factors impacting AGF diversity, Student t-tests were used to identify significant  
565 differences in the above alpha diversity estimates based on animal lifestyle (zoo-housed,  
566 domesticated, wild), and host phylogeny (families Bovidae, Equidae, Cervidae). To test the  
567 effect of the above host factors on the AGF community structure, Student t-tests were used to  
568 identify significant associations between specific AGF taxa and animal lifestyle (zoo-housed,  
569 domesticated, wild) or host family (families Bovidae, Equidae, Cervidae).

#### 570 **Isolation efforts.**

571 Fecal samples (either freshly obtained, or stored at -20°C in sterile, air-tight plastic tubes) were  
572 used for isolation. Care was taken to avoid sample repeated freezing and thawing. Samples were  
573 first enriched by incubation for 24 h at 39°C in rumen-fluid-cellobiose (RFC) medium  
574 supplemented with antibiotics (50 µg/mL kanamycin, 50 µg/mL penicillin, 20 µg/mL  
575 streptomycin, and 50 µg/ mL chloramphenicol)<sup>27,28,29,50,51</sup>. Subsequently, enrichments were  
576 serially diluted by adding approximately 1 ml of enriched samples to 9 mL of RF medium  
577 supplemented with 1% cellulose or a mixture of 0.5% switchgrass and 0.5% cellobiose. Since  
578 fungal hyphae and zoospores are usually attached to the coarse particulates in the enrichment,  
579 serial dilutions were conducted using Pasteur pipettes rather than syringes and needles, as the  
580 narrow bore of the needle prevented the fecal clumps from being transferred. Serial dilutions up

581 to a  $10^{-5}$  dilution were incubated at 39°C for 24–48 h. Dilutions showing visible signs of growth  
582 (clumping or floating plant materials, a change in the color of cellulose, and production of gas  
583 bubbles) were then used for the preparation of roll tubes<sup>55, 56</sup> on RFC agar medium. At the same  
584 time, and as a backup strategy in case the roll tubes failed to produce visible colonies, the  
585 dilution tubes themselves were subcultured and transferred to fresh medium with the same  
586 carbon source. Single colonies on roll tubes were then picked into liquid RFC medium, and at  
587 least three rounds of tube rolling and colony picking were conducted to ensure purity of the  
588 obtained colonies. To maximize the chances of obtaining isolates belonging to different genera,  
589 special attention was given, not only to picking colonies of different shapes and sizes, but also to  
590 picking several colonies of the same shape, as representatives of different genera could produce  
591 colonies with very similar macroscopic features. Isolates were maintained by biweekly  
592 subculturing into RFC medium. For long-term storage, cultures were stored on agar medium  
593 according to the procedure described by Calkins et al.<sup>51</sup>.

594 **Data accession.** Sanger-generated clone sequences from pure cultures were deposited in  
595 GenBank under accession numbers MT085665 - MT085741. SMRT-generated sequences were  
596 deposited at DDBJ/EMBL/GenBank under the Bioproject accession number PRJNA609702,  
597 Biosample accession numbers SAMN14258225, and Targeted Locus Study project accession  
598 KD VX00000000. The version described in this paper is the first version, KD VX01000000.

599

600 **Acknowledgements:** This work has been funded by the NSF-DEB grant 1557102 to N.H.Y. and  
601 M.S.E.

602

603 **Competing interests:** The authors declare no competing interest

604 Table 1. Representatives full-length sequences spanning the region "ITS1-5.8S rRNA-ITS2-  
605 D1/D2 LSU". GenBank accession numbers are shown for all clone sequences obtained from  
606 representative AGF isolates in our culture collection. For yet-uncultured AGF taxa, accession  
607 numbers refer to the SMRT generated sequence name in Datasets 1-3. Start and end positions of  
608 ITS1, 5.8S rRNA gene, ITS2, and the D1/D2 region of the LSU are shown.  
609

Table 1. Representatives full length sequences spanning the region "ITS1-5.8S rRNA-ITS2-D1/D2 LSU". GenBank accession numbers are shown for all clone sequences obtained from representative AGF isolates in our culture collection. For yet-uncultured AGF taxa, accession numbers refer to the SMRT generated sequence name in Datasets 1-3. Start and end positions of ITS1, 5.8S rRNA gene, ITS2, and the D1/D2 region of the LSU are shown.

| Name                                                    | GenBank Accession number* | Number of ITS1-5.8S-ITS2-D1/D2 LSU sequences |                                             | Position (number refers to the position within the accession where the region starts) |         |         |          | Alternate names | Reference  |
|---------------------------------------------------------|---------------------------|----------------------------------------------|---------------------------------------------|---------------------------------------------------------------------------------------|---------|---------|----------|-----------------|------------|
|                                                         |                           | # of isolates (# of clone sequences)         | # of SMRT-generated environmental sequences | ITS1                                                                                  | 5.8S    | ITS2    | LSU      |                 |            |
| <b>Cultured genera</b>                                  |                           |                                              |                                             |                                                                                       |         |         |          |                 |            |
| <i>Agriosomyces</i>                                     |                           |                                              |                                             |                                                                                       |         |         |          |                 |            |
|                                                         |                           | 1 (2 clones)                                 | 222                                         |                                                                                       |         |         |          |                 |            |
| <i>Agriosomyces longus</i> strain MS2, clone B          | MT085709                  |                                              |                                             | 1-226                                                                                 | 227-406 | 407-587 | 588-1372 |                 | This study |
| <i>Agriosomyces longus</i> strain MS2, clone C          | MT085708                  |                                              |                                             | 1-219                                                                                 | 220-401 | 402-582 | 583-1367 |                 | This study |
| <i>Akioshomyces</i>                                     |                           |                                              |                                             |                                                                                       |         |         |          |                 |            |
|                                                         |                           | 1 (5 clones)                                 | 1009                                        |                                                                                       |         |         |          |                 |            |
| <i>Akioshomyces papillarum</i> strain WT2, clone 7      | MT085737                  |                                              |                                             | 1-182                                                                                 | 183-357 | 358-540 | 541-1326 |                 | This study |
| <i>Akioshomyces papillarum</i> strain WT2, clone 8      | MT085738                  |                                              |                                             | 1-182                                                                                 | 183-357 | 358-540 | 541-1326 |                 | This study |
| <i>Akioshomyces papillarum</i> strain WT2, clone 9      | MT085739                  |                                              |                                             | 1-182                                                                                 | 183-360 | 361-538 | 539-1323 |                 | This study |
| <i>Akioshomyces papillarum</i> strain WT2, clone 10     | MT085740                  |                                              |                                             | 1-182                                                                                 | 183-357 | 358-540 | 541-1325 |                 | This study |
| <i>Akioshomyces papillarum</i> strain WT2, clone 12     | MT085741                  |                                              |                                             | 1-184                                                                                 | 185-359 | 360-538 | 539-1324 |                 | This study |
| <i>Anaeromyces</i>                                      |                           |                                              |                                             |                                                                                       |         |         |          |                 |            |
|                                                         |                           | 7 (15 clones)                                | 76                                          |                                                                                       |         |         |          |                 |            |
| <i>Anaeromyces contortus</i> isolate C3G Clone 10       | MG605705.1                |                                              |                                             | 1-222                                                                                 | 223-401 | 402-572 | 573-1356 |                 | 29         |
| <i>Anaeromyces contortus</i> isolate C3J Clone 2        | MG605699.1                |                                              |                                             | 1-226                                                                                 | 227-405 | 406-576 | 577-1362 |                 | 29         |
| <i>Anaeromyces contortus</i> isolate G3A Clone 1        | MG605688.1                |                                              |                                             | 1-221                                                                                 | 222-400 | 401-572 | 573-1358 |                 | 29         |
| <i>Anaeromyces contortus</i> isolate G3A clone 2        | MG605684.1                |                                              |                                             | 1-219                                                                                 | 220-397 | 398-569 | 570-1353 |                 | 29         |
| <i>Anaeromyces contortus</i> isolate G3A Clone 3        | MG605681.1                |                                              |                                             | 1-221                                                                                 | 222-399 | 400-571 | 572-1355 |                 | 29         |
| <i>Anaeromyces contortus</i> isolate G3A Clone 5        | MG605697.1                |                                              |                                             | 1-223                                                                                 | 224-402 | 403-573 | 574-1357 |                 | 29         |
| <i>Anaeromyces contortus</i> isolate G3C Clone 4        | MG605685.1                |                                              |                                             | 1-217                                                                                 | 218-395 | 396-567 | 568-1353 |                 | 29         |
| <i>Anaeromyces contortus</i> isolate G3C Clone 5        | MG605679.1                |                                              |                                             | 1-221                                                                                 | 222-399 | 400-572 | 573-1358 |                 | 29         |
| <i>Anaeromyces contortus</i> isolate G3C Clone 6        | MG605683.1                |                                              |                                             | 1-221                                                                                 | 222-399 | 400-571 | 572-1355 |                 | 29         |
| <i>Anaeromyces contortus</i> isolate G3G Clone 10       | MG605690.1                |                                              |                                             | 1-220                                                                                 | 221-398 | 399-571 | 572-1357 |                 | 29         |
| <i>Anaeromyces contortus</i> isolate G3G Clone 8        | MG605686.1                |                                              |                                             | 1-216                                                                                 | 217-394 | 395-566 | 567-1350 |                 | 29         |
| <i>Anaeromyces contortus</i> isolate G3G Clone 9        | MG605691.1                |                                              |                                             | 1-221                                                                                 | 222-399 | 400-572 | 573-1358 |                 | 29         |
| <i>Anaeromyces contortus</i> isolate Na Clone 5         | MG605704.1                |                                              |                                             | 1-223                                                                                 | 224-402 | 403-573 | 574-1357 |                 | 29         |
| <i>Anaeromyces contortus</i> isolate Na Clone 6         | MG605701.1                |                                              |                                             | 1-226                                                                                 | 227-406 | 407-578 | 579-1362 |                 | 29         |
| <i>Anaeromyces contortus</i> isolate X4 Clone 2         | MG605706.1                |                                              |                                             | 1-223                                                                                 | 224-402 | 403-573 | 574-1357 |                 | 29         |
| <i>Buwchfawromyces</i>                                  |                           |                                              |                                             |                                                                                       |         |         |          |                 |            |
|                                                         |                           | 0                                            | 55                                          |                                                                                       |         |         |          | SK2             |            |
| <i>Buwchfawromyces eastonii</i>                         | AoudOld_160513            |                                              |                                             | 1-168                                                                                 | 169-326 | 326-536 | 537-1235 |                 | This study |
| <i>Caecomyces</i>                                       |                           |                                              |                                             |                                                                                       |         |         |          |                 |            |
|                                                         |                           | 3 (3 clones)                                 | 879                                         |                                                                                       |         |         |          |                 |            |
| <i>Caecomyces</i> sp. isolate DS1 Clone C3              | MT085702                  |                                              |                                             | 1-205                                                                                 | 206-381 | 382-583 | 584-1366 |                 | This study |
| <i>Caecomyces</i> sp. isolate CYF                       | JQ782554.1                |                                              |                                             | 65-280                                                                                | 281-456 | 457-654 | 655-1379 |                 | 23         |
| <i>Caecomyces</i> sp. isolate CYR                       | JQ782555.1                |                                              |                                             | 65-274                                                                                | 275-450 | 451-646 | 647-1371 |                 | 23         |
| <i>Capellomyces</i>                                     |                           |                                              |                                             |                                                                                       |         |         |          |                 |            |
|                                                         |                           | 2 (5 clones)                                 | 0                                           |                                                                                       |         |         |          |                 |            |
| <i>Capellomyces foraminis</i> isolate BGB11 Clone C1    | MT085700                  |                                              |                                             | 1-220                                                                                 | 221-400 | 401-577 | 578-1360 |                 | This study |
| <i>Capellomyces foraminis</i> isolate BGB11 Clone C2    | MT085697                  |                                              |                                             | 1-220                                                                                 | 221-401 | 402-578 | 579-1362 |                 | This study |
| <i>Capellomyces foraminis</i> isolate BGB11 Clone C3    | MT085698                  |                                              |                                             | 1-220                                                                                 | 221-401 | 402-579 | 580-1363 |                 | This study |
| <i>Capellomyces foraminis</i> isolate BGB11 Clone C4    | MT085699                  |                                              |                                             | 1-220                                                                                 | 221-401 | 402-578 | 579-1363 |                 | This study |
| <i>Capellomyces elongatus</i>                           | MT085701                  |                                              |                                             | 1-250                                                                                 | 251-432 | 433-609 | 610-1393 |                 | This study |
| <i>Cyllamyces</i>                                       |                           |                                              |                                             |                                                                                       |         |         |          |                 |            |
|                                                         |                           | 1 (clones 5)                                 | 704                                         |                                                                                       |         |         |          | MN1, SP8        |            |
| <i>Cyllamyces</i> sp. isolate TSB2 Clone B10            | MT085707                  |                                              |                                             | 1-170                                                                                 | 171-347 | 348-537 | 538-1320 |                 | This study |
| <i>Cyllamyces</i> sp. isolate TSB2 Clone B11            | MT085705                  |                                              |                                             | 1-170                                                                                 | 171-347 | 348-538 | 539-1321 |                 | This study |
| <i>Cyllamyces</i> sp. isolate TSB2 Clone B12            | MT085703                  |                                              |                                             | 1-170                                                                                 | 171-347 | 348-537 | 538-1320 |                 | This study |
| <i>Cyllamyces</i> sp. isolate TSB2 Clone B8             | MT085704                  |                                              |                                             | 1-168                                                                                 | 169-344 | 345-536 | 537-1319 |                 | This study |
| <i>Cyllamyces</i> sp. isolate TSB2 Clone B9             | MT085706                  |                                              |                                             | 1-168                                                                                 | 169-345 | 346-535 | 536-1318 |                 | This study |
| <i>Ghazallomyces</i>                                    |                           |                                              |                                             |                                                                                       |         |         |          |                 |            |
|                                                         |                           | 1 (4 clones)                                 | 102                                         |                                                                                       |         |         |          |                 |            |
| <i>Ghazallomyces constrictus</i> isolate AXS31 Clone B1 | MT085693                  |                                              |                                             | 1-189                                                                                 | 190-370 | 371-564 | 565-1348 |                 | This study |
| <i>Ghazallomyces constrictus</i> isolate AXS31 Clone B2 | MT085695                  |                                              |                                             | 1-186                                                                                 | 187-364 | 365-556 | 557-1339 |                 | This study |
| <i>Ghazallomyces constrictus</i> isolate AXS31 Clone B3 | MT085694                  |                                              |                                             | 1-186                                                                                 | 187-364 | 365-556 | 557-1339 |                 | This study |
| <i>Ghazallomyces constrictus</i> isolate AXS31 Clone B5 | MT085696                  |                                              |                                             | 1-189                                                                                 | 190-367 | 368-552 | 553-1335 |                 | This study |
| <i>Joblinomyces</i>                                     |                           |                                              |                                             |                                                                                       |         |         |          |                 |            |
|                                                         |                           | 2 (10 clones)                                | 1076                                        |                                                                                       |         |         |          | AL5             |            |
| <i>Joblinomyces apicalis</i> isolate GFH681 Clone1      | MT085665                  |                                              |                                             | 1-213                                                                                 | 214-388 | 389-561 | 562-1344 |                 | This study |
| <i>Joblinomyces apicalis</i> isolate GFH681 Clone2      | MT085666                  |                                              |                                             | 1-213                                                                                 | 214-390 | 391-564 | 565-1347 |                 | This study |
| <i>Joblinomyces apicalis</i> isolate GFH681 Clone4      | MT085667                  |                                              |                                             | 1-215                                                                                 | 216-393 | 394-568 | 569-1351 |                 | This study |
| <i>Joblinomyces apicalis</i> isolate GFH681 Clone5      | MT085668                  |                                              |                                             | 1-215                                                                                 | 216-393 | 394-568 | 569-1351 |                 | This study |
| <i>Joblinomyces apicalis</i> isolate GFH681 Clone6      | MT085669                  |                                              |                                             | 1-213                                                                                 | 214-389 | 390-563 | 564-1346 |                 | This study |
| <i>Joblinomyces apicalis</i> isolate GFH683 Clone1      | MT085670                  |                                              |                                             | 1-213                                                                                 | 214-389 | 390-563 | 564-1346 |                 | This study |

|                                                             |                |                |      |             |             |             |             |          |            |
|-------------------------------------------------------------|----------------|----------------|------|-------------|-------------|-------------|-------------|----------|------------|
| <i>Joblinomyces apicalis</i> isolate GFH683 Clone2          | MT085671       |                |      | 1-213       | 214-389     | 390-563     | 564-1346    |          | This study |
| <i>Joblinomyces apicalis</i> isolate GFH683 Clone3          | MT085672       |                |      | 1-212       | 213-388     | 389-562     | 563-1345    |          | This study |
| <i>Joblinomyces apicalis</i> isolate GFH683 Clone4          | MT085673       |                |      | 1-213       | 214-389     | 390-563     | 564-1346    |          | This study |
| <i>Joblinomyces apicalis</i> isolate GFH683 Clone5          | MT085674       |                |      | 1-213       | 214-389     | 390-563     | 564-1346    |          | This study |
| <i>Feromyces</i>                                            |                | 4 (11 clones)  | 2373 |             |             |             |             | AL6      |            |
| <i>Feromyces austinii</i> isolate DS10 Clone 11             | MG584196.1     |                |      | 1-192       | 193-368     | 369-570     | 571-1353    |          | 28         |
| <i>Feromyces austinii</i> isolate DS10 Clone 12             | MG584194.1     |                |      | 1-192       | 193-368     | 369-570     | 571-1353    |          | 28         |
| <i>Feromyces austinii</i> isolate DS10 Clone 7              | MG584192.1     |                |      | 1-192       | 193-368     | 369-571     | 572-1354    |          | 28         |
| <i>Feromyces austinii</i> isolate DS10 Clone 8              | MG584200.1     |                |      | 1-192       | 193-368     | 369-570     | 571-1352    |          | 28         |
| <i>Feromyces austinii</i> isolate DS10 Clone 9              | MG584197.1     |                |      | 1-192       | 193-368     | 369-570     | 571-1353    |          | 28         |
| <i>Feromyces austinii</i> isolate F3A Clone 3               | MG584193.1     |                |      | 1-192       | 193-368     | 369-570     | 571-1353    |          | 28         |
| <i>Feromyces austinii</i> isolate F3B Clone 10              | MG584190.1     |                |      | 1-192       | 193-368     | 369-570     | 571-1352    |          | 28         |
| <i>Feromyces austinii</i> isolate R4A Clone 1               | MG584191.1     |                |      | 1-192       | 193-368     | 369-570     | 571-1353    |          | 28         |
| <i>Feromyces austinii</i> isolate R4A Clone 2               | MG584199.1     |                |      | 1-192       | 193-368     | 369-570     | 571-1353    |          | 28         |
| <i>Feromyces austinii</i> isolate R4A Clone 3               | MG584198.1     |                |      | 1-192       | 193-368     | 369-570     | 571-1353    |          | 28         |
| <i>Feromyces austinii</i> isolate R4A Clone 5               | MG584195.1     |                |      | 1-192       | 193-368     | 369-570     | 571-1353    |          | 28         |
| <i>Khyollomyces</i>                                         |                | 1 (1 clone)    | 2553 |             |             |             |             | AL1      |            |
| <i>Khyollomyces ramosus</i> isolate ZS33 Clone 8            | MT085710       |                |      | 1-193       | 194-369     | 370-543     | 544-1327    |          | This study |
| <i>Liebetanzomyces</i>                                      |                | 1 (7 clones)   | 31   |             |             |             |             | SP4      |            |
| <i>Liebetanzomyces</i> sp. isolate Cel1A Clone 2            | MT085726       |                |      | 1-225       | 226-403     | 404-577     | 578-1361    |          | This study |
| <i>Liebetanzomyces</i> sp. isolate Cel1A Clone 3            | MT085727       |                |      | 1-225       | 226-403     | 404-577     | 578-1361    |          | This study |
| <i>Liebetanzomyces</i> sp. isolate Cel1A Clone 4            | MT085728       |                |      | 1-225       | 226-403     | 404-577     | 578-1361    |          | This study |
| <i>Liebetanzomyces</i> sp. isolate Cel1A Clone 6            | MT085729       |                |      | 1-225       | 226-403     | 404-577     | 578-1362    |          | This study |
| <i>Liebetanzomyces</i> sp. isolate Cel1A Clone 7            | MT085730       |                |      | 1-223       | 224-401     | 402-576     | 577-1362    |          | This study |
| <i>Liebetanzomyces</i> sp. isolate Cel1A Clone 8            | MT085731       |                |      | 1-225       | 226-403     | 404-577     | 578-1361    |          | This study |
| <i>Liebetanzomyces</i> sp. isolate Cel1A Clone 9            | MT085732       |                |      | 1-223       | 224-401     | 402-575     | 576-1359    |          | This study |
| <i>Neocallimastix</i>                                       |                | 14 (14 clones) | 794  |             |             |             |             | SP6      |            |
| <i>Neocallimastix californiae</i> strain G1**               | MCOG01000947.1 |                |      | 12566-12742 | 12743-12917 | 12918-13113 | 13114-13895 |          | 36         |
| <i>Neocallimastix californiae</i> strain G1**               | MCOG01000947.1 |                |      | 2806-2982   | 2983-3157   | 3158-3354   | 3355-4136   |          | 36         |
| <i>Neocallimastix californiae</i> strain G1**               | MCOG01001752.1 |                |      | 2193-2369   | 2018-2192   | 1821-2017   | 1820-1036   |          | 36         |
| <i>Neocallimastix</i> cf. <i>cameroonii</i> isolate G3      | MT085722       |                |      | 1-178       | 179-356     | 357-554     | 555-1338    |          | This study |
| <i>Neocallimastix</i> sp isolate HeF5 Clone 1               | MT085723       |                |      | 1-229       | 230-408     | 409-588     | 589-1371    |          | This study |
| <i>Neocallimastix</i> sp isolate HeF6 Clone 6               | MT085724       |                |      | 1-240       | 241-419     | 420-602     | 603-1385    |          | This study |
| <i>Neocallimastix</i> sp isolate HeF7 Clone 3               | MT085725       |                |      | 1-229       | 230-407     | 408-585     | 586-1368    |          | This study |
| <i>Neocallimastix</i> cf. <i>frontalis</i> isolate NYF1     | JQ782542.1     |                |      | 67-308      | 309-486     | 487-665     | 666-1390    |          | 23         |
| <i>Neocallimastix</i> cf. <i>frontalis</i> isolate NYF2     | JQ782543.1     |                |      | 67-307      | 308-485     | 486-672     | 673-1397    |          | 23         |
| <i>Neocallimastix</i> cf. <i>frontalis</i> isolate NYF3     | JQ782544.1     |                |      | 67-296      | 297-474     | 475-654     | 655-1379    |          | 23         |
| <i>Neocallimastix</i> cf. <i>frontalis</i> isolate NYF4     | JQ782545.1     |                |      | 67-310      | 311-488     | 489-676     | 677-1401    |          | 23         |
| <i>Neocallimastix</i> cf. <i>frontalis</i> isolate NYR1     | JQ782546.1     |                |      | 67-307      | 308-486     | 487-669     | 670-1394    |          | 23         |
| <i>Neocallimastix</i> cf. <i>frontalis</i> isolate NYR2     | JQ782547.1     |                |      | 67-317      | 318-496     | 497-676     | 677-1401    |          | 23         |
| <i>Neocallimastix</i> cf. <i>frontalis</i> isolate NYR3     | JQ782548.1     |                |      | 67-317      | 318-495     | 496-678     | 679-1403    |          | 23         |
| <i>Neocallimastix</i> cf. <i>frontalis</i> isolate NYR4     | JQ782549.1     |                |      | 67-295      | 296-473     | 474-654     | 655-1380    |          | 23         |
| <i>Neocallimastix</i> cf. <i>frontalis</i> isolate NYR5     | JQ782550.1     |                |      | 67-309      | 310-488     | 489-667     | 668-1392    |          | 23         |
| <i>Oontomyces</i>                                           |                | 0              | 0    |             |             |             |             |          |            |
| <i>Oontomyces anksri</i> strain SSD-CIB1                    | JX017310.1     |                |      | 60-291      | 292-467     | 468-642     | 643-695     |          | 26         |
| <i>Oontomyces anksri</i> strain SSD-CIB1                    | JX017314.1     |                |      |             |             |             | 1-772       |          | 26         |
| <i>Orpinomyces</i>                                          |                | 23 clones      | 349  |             |             |             |             |          |            |
| <i>Orpinomyces</i> sp. OUS1                                 | AJ864475.1     |                |      | 842-1056    | 1057-1241   | 1242-1418   | 1419-2201   |          | 49         |
| <i>Orpinomyces</i> cf. <i>joyonii</i> isolate D3A Clone 3   | MT085735       |                |      | 1-183       | 184-360     | 361-539     | 540-1322    |          | This study |
| <i>Orpinomyces</i> cf. <i>joyonii</i> isolate D3A Clone F11 | MT085736       |                |      | 1-182       | 183-357     | 358-537     | 538-1320    |          | This study |
| <i>Orpinomyces</i> cf. <i>joyonii</i> isolate D3A Clone G09 | MT085733       |                |      | 1-184       | 185-359     | 360-538     | 539-1321    |          | This study |
| <i>Orpinomyces</i> cf. <i>joyonii</i> isolate D3A Clone H09 | MT085734       |                |      | 1-187       | 188-362     | 363-540     | 541-1323    |          | This study |
| <i>Orpinomyces</i> sp. OYF                                  | JQ782551.1     |                |      | 67-267      | 268-447     | 448-630     | 631-1356    |          | 23         |
| <i>Orpinomyces</i> sp. OYR2                                 | JQ782553.1     |                |      | 65-253      | 254-431     | 432-610     | 611-1335    |          | 23         |
| <i>Pecoromyces</i>                                          |                | 2 (4 clones)   | 248  |             |             |             |             |          |            |
| <i>Pecoromyces ruminatum</i> isolate C1A**                  | ASRE01020932.1 |                |      | 909-1095    | 1096-1271   | 1272-1452   | 1453-2235   |          | 43         |
| <i>Pecoromyces ruminatum</i> isolate C1A**                  | ASRE01007038.1 |                |      | 790-976     | 977-1152    | 1153-1333   | 1334-2116   |          | 43         |
| <i>Pecoromyces ruminatum</i> isolate C1A**                  | ASRE01022884.1 |                |      | 2760-2946   | 2584-2759   | 2403-2583   | 1620-2402   |          | 43         |
| <i>Pecoromyces ruminatum</i> isolate S4B                    | MT085711       |                |      | 1-184       | 185-360     | 361-542     | 543-1325    |          | This study |
| <i>Piromyces</i>                                            |                | 5 (26 clones)  | 3818 |             |             |             |             | AL7, UC1 |            |
| <i>Piromyces finnis</i> strain finn***                      | MCFH01000027.1 |                |      | 1034-1105   | 1106-1285   | 1286-1470   | 1471-2253   |          | 36         |
| <i>Piromyces finnis</i> strain finn***                      | MCFH01000027.1 |                |      | 9568-9639   | 9640-9819   | 9820-10004  | 10005-10787 |          | 36         |
| <i>Piromyces finnis</i> strain finn***                      | MCFH01000027.1 |                |      | 18102-18173 | 18174-18353 | 18354-18538 | 18539-19321 |          | 36         |
| <i>Piromyces</i> sp. isolate A1 Clone A1                    | MT085682       |                |      | 1-199       | 200-375     | 376-548     | 549-1333    |          | This study |
| <i>Piromyces</i> sp. isolate A1 Clone A12                   | MT085684       |                |      | 1-198       | 199-374     | 375-547     | 548-1330    |          | This study |



|                                                                                                       |                |              |      |        |         |         |          |  |            |
|-------------------------------------------------------------------------------------------------------|----------------|--------------|------|--------|---------|---------|----------|--|------------|
| <i>Piromyces</i> sp. isolate A1 Clone A2                                                              | MT085679       |              |      | 1-199  | 200-375 | 376-548 | 549-1331 |  | This study |
| <i>Piromyces</i> sp. isolate A1 Clone A3                                                              | MT085683       |              |      | 1-199  | 200-375 | 376-548 | 549-1331 |  | This study |
| <i>Piromyces</i> sp. isolate A1 Clone A4                                                              | MT085685       |              |      | 1-199  | 200-375 | 376-548 | 549-1331 |  | This study |
| <i>Piromyces</i> sp. isolate A1 Clone A5                                                              | MT085688       |              |      | 1-199  | 200-375 | 376-548 | 549-1335 |  | This study |
| <i>Piromyces</i> sp. isolate A1 Clone A6                                                              | MT085687       |              |      | 1-199  | 200-375 | 376-548 | 549-1331 |  | This study |
| <i>Piromyces</i> sp. isolate A1 Clone A7                                                              | MT085686       |              |      | 1-199  | 200-375 | 376-548 | 549-1334 |  | This study |
| <i>Piromyces</i> sp. isolate A1 Clone A8                                                              | MT085681       |              |      | 1-199  | 200-375 | 376-548 | 549-1331 |  | This study |
| <i>Piromyces</i> sp. isolate A1 Clone A9                                                              | MT085680       |              |      | 1-199  | 200-375 | 376-548 | 549-1331 |  | This study |
| <i>Piromyces</i> sp. isolate Cel1B Clone 1                                                            | MT085717       |              |      | 1-198  | 199-375 | 376-548 | 549-1331 |  | This study |
| <i>Piromyces</i> sp. isolate Cel1B Clone 10                                                           | MT085721       |              |      | 1-198  | 199-374 | 375-547 | 548-1332 |  | This study |
| <i>Piromyces</i> sp. isolate Cel1B Clone 2                                                            | MT085718       |              |      | 1-198  | 199-375 | 376-548 | 549-1331 |  | This study |
| <i>Piromyces</i> sp. isolate Cel1B Clone 3                                                            | MT085719       |              |      | 1-198  | 199-375 | 376-549 | 550-1334 |  | This study |
| <i>Piromyces</i> sp. isolate Cel1B Clone 6                                                            | MT085720       |              |      | 1-198  | 199-374 | 375-547 | 548-1332 |  | This study |
| <i>Piromyces</i> sp. isolate DB3 Clone B2                                                             | MT085690       |              |      | 1-226  | 227-404 | 405-592 | 593-1350 |  | This study |
| <i>Piromyces</i> sp. isolate DB3 Clone B3                                                             | MT085691       |              |      | 1-227  | 228-405 | 406-592 | 593-1359 |  | This study |
| <i>Piromyces</i> sp. isolate DB3 Clone B4                                                             | MT085689       |              |      | 1-225  | 226-403 | 404-588 | 589-1351 |  | This study |
| <i>Piromyces</i> sp. isolate Jen1 Clone 1                                                             | MT085712       |              |      | 1-201  | 202-378 | 379-552 | 553-1335 |  | This study |
| <i>Piromyces</i> sp. isolate Jen1 Clone 2                                                             | MT085713       |              |      | 1-201  | 202-378 | 379-552 | 553-1335 |  | This study |
| <i>Piromyces</i> sp. isolate Jen1 Clone 3                                                             | MT085714       |              |      | 1-201  | 202-377 | 378-550 | 551-1333 |  | This study |
| <i>Piromyces</i> sp. isolate Jen1 Clone 4                                                             | MT085715       |              |      | 1-201  | 202-377 | 378-550 | 551-1333 |  | This study |
| <i>Piromyces</i> sp. isolate Jen1 Clone 5                                                             | MT085716       |              |      | 1-201  | 202-378 | 379-552 | 553-1335 |  | This study |
| <b>Tahromyces</b>                                                                                     |                |              |      |        |         |         |          |  |            |
|                                                                                                       |                | 4 (4 clones) |      |        |         |         |          |  |            |
| <i>Tahromyces munnarensis</i> isolate TDFKJa1924                                                      | MT085677       |              |      | 1-178  | 179-358 | 359-537 | 538-1316 |  | This study |
| <i>Tahromyces munnarensis</i> isolate TDFKJa1926                                                      | MT085676       |              |      | 1-178  | 179-358 | 359-537 | 538-1307 |  | This study |
| <i>Tahromyces munnarensis</i> isolate TDFKJa1927                                                      | MT085678       |              |      | 1-178  | 179-358 | 359-537 | 538-1320 |  | This study |
| <i>Tahromyces munnarensis</i> isolate TDFKJa193                                                       | MT085675       |              |      | 1-178  | 179-358 | 359-537 | 538-1313 |  | This study |
| <b>Uncultured lineages</b>                                                                            |                |              |      |        |         |         |          |  |            |
| <b>Identified in this study (accession number is the sequence name in Supplementary datasets 1-3)</b> |                |              |      |        |         |         |          |  |            |
| AL3                                                                                                   | DwGoat_61688   |              | 86   | 57-200 | 201-352 | 353-604 | 605-1358 |  | This study |
| AL4                                                                                                   | Sheep_129918   |              | 1    | 67-268 | 269-425 | 426-630 | 631-1394 |  | This study |
| AL8                                                                                                   | Cow_130070     |              | 151  | 88-273 | 274-432 | 433-653 | 654-1424 |  | This study |
| MN3                                                                                                   | Cow_90808      |              | 3    | 76-280 | 281-438 | 439-640 | 641-1423 |  | This study |
| MN4                                                                                                   | OSUGoat_119881 |              | 3    | 69-276 | 277-434 | 435-666 | 667-1444 |  | This study |
| SK3                                                                                                   | Aoud18_104764  |              | 3    | 67-279 | 280-436 | 437-676 | 677-1444 |  | This study |
| SK4                                                                                                   | Aoud18_141177  |              | 1387 | 71-264 | 265-421 | 422-644 | 645-1421 |  | This study |
| <b>Not identified in this study (GenBank accession number of a representative ITS1 sequence)</b>      |                |              |      |        |         |         |          |  |            |
| AL2                                                                                                   | GQ826457       |              |      |        |         |         |          |  | 3          |
| BlackRhino                                                                                            | JF423850       |              |      |        |         |         |          |  | 5          |
| DA1                                                                                                   | JX184822       |              |      |        |         |         |          |  | 13         |
| DT1                                                                                                   | GQ850291       |              |      |        |         |         |          |  | 48         |
| JH1/ SP5                                                                                              | GU911240       |              |      |        |         |         |          |  | 17, 46     |
| KF1                                                                                                   | GQ850345       |              |      |        |         |         |          |  | 45         |
| MN2                                                                                                   | AM690075       |              |      |        |         |         |          |  | 47         |
| SK1                                                                                                   | JF423570       |              |      |        |         |         |          |  | 5          |
| SP1                                                                                                   | GQ678747       |              |      |        |         |         |          |  | 17         |
| SP2                                                                                                   | GQ698377       |              |      |        |         |         |          |  | 17         |
| SP3                                                                                                   | GQ657498       |              |      |        |         |         |          |  | 17         |
| SP7                                                                                                   | GU910219.1     |              |      |        |         |         |          |  | 17         |
| <b>Novel lineages (accession number is the sequence name in Supplementary datasets 1-3)</b>           |                |              |      |        |         |         |          |  |            |
| RH1                                                                                                   | Cow_130696     |              | 13   | 66-222 | 223-378 | 379-593 | 594-1369 |  | This study |
| RH2                                                                                                   | Oryx_79099     |              | 74   | 67-270 | 271-425 | 426-660 | 661-1440 |  | This study |
| RH3                                                                                                   | AmBis_130671   |              | 3    | 71-246 | 247-404 | 405-613 | 614-1374 |  | This study |
| RH4                                                                                                   | Cow_156860     |              | 13   | 68-238 | 239-393 | 394-597 | 598-1379 |  | This study |
| RH5                                                                                                   | Sheep_119174   |              | 1681 | 69-280 | 281-438 | 439-646 | 647-1426 |  | This study |
| RH6                                                                                                   | Cow_144271     |              | 2    | 78-289 | 290-446 | 447-653 | 654-1433 |  | This study |

\*GenBank Accession numbers are provided for Sanger sequenced clones from all fungal isolates. PacBio-generated datasets are present in GenBank in the Bioproject accession number PRJNA609702, Biosample accession numbers SAMN14258225, and Targeted Locus Study project accession KDVBX00000000. FASTA files of ITS1-5.8S-ITS2-D1/D2 LSU region, as well as bioinformatically extracted ITS1 region and D1/D2 LSU regions are provided as supplementary documents (Datasets 1-3)

\*\* Sequences extracted from a genomic assembly

610 Table 2. Animals sampled in this study, numbers of sequences obtained (N), number of observed OTUs, and various diversity indices both at the species  
 611 equivalent (0.02) and the genus levels

| Sample           | Host description |           | N*   | Observed number of OTUs |       | Chao    |       | Ace     |       | Simpson evenness |       | Shannon |       | Diversity ranking** |       | Coverage*** |       |
|------------------|------------------|-----------|------|-------------------------|-------|---------|-------|---------|-------|------------------|-------|---------|-------|---------------------|-------|-------------|-------|
|                  | Family           | Lifestyle |      | Sp. Eq.                 | Genus | Sp. Eq. | Genus | Sp. Eq. | Genus | Sp. Eq.          | Genus | Sp. Eq. | Genus | Sp. Eq.             | Genus | Sp. Eq.     | Genus |
| Alpaca           | Camelidae        | Domestic  | 240  | 19                      | 9     | 26.2    | 9.5   | 30.5    | 10.8  | 0.27             | 0.50  | 1.99    | 1.64  | 17.3                | 18.8  | 0.94        | 0.99  |
| American bison   | Bovidae          | Zoo       | 183  | 17                      | 11    | 22.6    | 11.3  | 41.6    | 12.2  | 0.13             | 0.14  | 1.45    | 0.90  | 9.8                 | 7.5   | 0.93        | 0.99  |
| American elk     | Cervidae         | Zoo       | 99   | 11                      | 9     | 16      | 11    | 28.2    | 15.3  | 0.17             | 0.21  | 1.12    | 1.01  | 6.3                 | 10.5  | 0.92        | 0.96  |
| Aoudad sheep (1) | Bovidae          | Wild      | 3381 | 80                      | 17    | 111     | 23    | 159.4   | 27    | 0.03             | 0.15  | 1.54    | 1.17  | 13.5                | 7     | 0.99        | 1     |
| Aoudad sheep (2) | Bovidae          | Wild      | 1779 | 55                      | 13    | 57      | 13    | 59.9    | 13.4  | 0.05             | 0.13  | 1.78    | 0.91  | 11.2                | 11.8  | 0.99        | 1     |
| Axis deer        | Cervidae         | Wild      | 367  | 18                      | 9     | 18.6    | 9.5   | 19.6    | 11.6  | 0.36             | 0.49  | 2.17    | 1.61  | 19                  | 19.5  | 0.99        | 0.99  |
| Blackbuck deer   | Bovidae          | Wild      | 145  | 21                      | 13    | 34.8    | 16    | 67.7    | 17    | 0.18             | 0.24  | 1.93    | 1.59  | 16                  | 16.7  | 0.91        | 0.97  |
| Boer goat        | Bovidae          | Wild      | 2503 | 41                      | 9     | 49.1    | 9     | 58.8    | 9     | 0.05             | 0.21  | 1.12    | 0.88  | 6.5                 | 8.3   | 0.99        | 1     |
| Domestic cow     | Bovidae          | Domestic  | 727  | 45                      | 13    | 46.7    | 16    | 48.5    | 15.4  | 0.06             | 0.14  | 1.95    | 1.03  | 13.5                | 10.2  | 0.98        | 1     |
| Domestic goat    | Bovidae          | Domestic  | 162  | 23                      | 15    | 39.5    | 16    | 70.7    | 17.2  | 0.40             | 0.43  | 2.52    | 2.10  | 20.3                | 21    | 0.87        | 1     |
| Domestic horse   | Equidae          | Domestic  | 498  | 15                      | 8     | 15.5    | 8.3   | 17.7    | 10    | 0.11             | 0.35  | 0.94    | 1.18  | 5.3                 | 13.7  | 0.99        | 1     |
| Domestic sheep   | Bovidae          | Domestic  | 1349 | 33                      | 9     | 33.7    | 9     | 34.5    | 9.5   | 0.04             | 0.12  | 0.72    | 0.25  | 2.5                 | 3     | 1           | 1     |
| Dwarf goat       | Bovidae          | Zoo       | 519  | 15                      | 8     | 20.3    | 18    | 36.7    | 17.5  | 0.08             | 0.13  | 0.49    | 0.14  | 1                   | 2     | 0.98        | 0.99  |
| Fallow deer      | Cervidae         | Wild      | 1368 | 43                      | 12    | 46.7    | 12.3  | 48.7    | 13.2  | 0.08             | 0.13  | 1.67    | 0.78  | 14.5                | 5.3   | 0.99        | 1     |
| Longhorn cattle  | Bovidae          | Domestic  | 62   | 9                       | 5     | 16.5    | 5     | 47.2    | 5.8   | 0.28             | 0.41  | 1.37    | 0.96  | 11                  | 10    | 0.82        | 0.98  |
| Miniature donkey | Equidae          | Zoo       | 56   | 12                      | 8     | 30      | 11    | 191.6   | 18    | 0.23             | 0.46  | 1.50    | 1.46  | 11                  | 17.2  | 0.80        | 0.93  |
| Mouflon ram      | Bovidae          | Wild      | 297  | 17                      | 11    | 35      | 11.3  | 111     | 14.3  | 0.23             | 0.31  | 1.80    | 1.55  | 16                  | 17.2  | 0.95        | 0.99  |
| Oryx             | Bovidae          | Wild      | 780  | 34                      | 15    | 36.2    | 16    | 41.9    | 17.7  | 0.26             | 0.16  | 2.52    | 1.35  | 20.7                | 13.8  | 0.98        | 0.98  |

|                   |          |      |      |    |    |    |     |      |      |      |      |      |      |     |      |      |      |
|-------------------|----------|------|------|----|----|----|-----|------|------|------|------|------|------|-----|------|------|------|
| Pere David's deer | Cervidae | Zoo  | 169  | 7  | 6  | 10 | 6.5 | 17   | 7.8  | 0.32 | 0.36 | 0.96 | 0.88 | 6.7 | 10.5 | 0.96 | 0.99 |
| White-tail deer   | Cervidae | Wild | 946  | 23 | 6  | 23 | 7.5 | 23.4 | 14.7 | 0.06 | 0.17 | 0.75 | 0.07 | 2.8 | 1    | 1    | 1    |
| Zebra             | Equidae  | Zoo  | 2067 | 55 | 11 | 73 | 13  | 85.4 | 15   | 0.03 | 0.15 | 1.10 | 0.76 | 6   | 6    | 0.99 | 1    |

612 \*: N refers to the number of sequences obtained for each of the animals sampled.

613 \*\*: Diversity ranking is the average rank obtained using both an information-related diversity ordering method (Renyi generalized  
614 entropy), and an expected number of species-related diversity ordering method (Hulbert family of diversity indices). Samples are  
615 ranked from the least diverse (rank 1) to the most diverse (rank 21).

616 \*\*\*: Coverage refers to the Good's coverage index.

617

618

619

620

621

622

623

624

625

626

627

628

629 Table 3. Number and sources of isolates obtained in this study.

| AGF genus             | Source             | Number of isolates | % Abundance in that animal |
|-----------------------|--------------------|--------------------|----------------------------|
| <i>Agriosomyces</i>   | Mouflon            | 4                  | 3.28                       |
|                       | Boer goat          | 1                  | 8.5                        |
| <i>Aklioshbomyces</i> | White-tail deer    | 9                  | 98.95                      |
| <i>Anaeromyces</i>    | Domesticated cow   | 4                  | 0.68                       |
|                       | domesticated goat  | 12                 | 2.44                       |
|                       | American bison     | 4                  | 1.63                       |
|                       | Alpaca             | 4                  | 17.01                      |
| <i>Caecomycetes</i>   | Fallow deer        | 1                  | 0.44                       |
| <i>Capellamyces</i>   | Boer goat          | 5                  | ND                         |
| <i>Feramyces</i>      | Aoudad sheep (1)   | 5                  | 55.31                      |
|                       | Fallow deer        | 1                  | 4.46                       |
| <i>Ghazallomyces</i>  | Axis deer          | 11                 | 27.79                      |
| <i>Khyollomyces</i>   | Zebra              | 16                 | 74.5                       |
| <i>Neocallimastix</i> | Dwarf goat         | 7                  | 97.88                      |
|                       | Fallow deer        | 10                 | 1.24                       |
|                       | Pere David's deer  | 10                 | 54.44                      |
|                       | American elk       | 12                 | 72                         |
| <i>Orpinomyces</i>    | Domesticated cow   | 8                  | 1.09                       |
|                       | Longhorn           | 3                  | 3.03                       |
|                       | American bison     | 6                  | 80.43                      |
|                       | Alpaca             | 6                  | 33.2                       |
| <i>Pecoramyces</i>    | Domesticated sheep | 10                 | 0.37                       |
|                       | Mouflon            | 3                  | 12.79                      |
|                       | Oryx               | 11                 | 13.78                      |
|                       | Aoudad sheep (2)   | 13                 | 0.39                       |
| <i>Piromyces</i>      | Domesticated cow   | 5                  | 1.64                       |
|                       | domesticated sheep | 3                  | 1.6                        |
|                       | Mouflon ram        | 2                  | 23.61                      |
|                       | Axis deer          | 1                  | 28.88                      |
|                       | Blackbuck deer     | 7                  | 6.21                       |
|                       | Domesticated horse | 6                  | 80.12                      |
|                       | Miniature donkey   | 16                 | 69.64                      |

630

631

632 **Figures Legends**

633 **Figure 1.** Box and whisker plots showing the variability in intra-genus length (A-B) and  
634 sequence divergence cutoff (C-D) for the ITS1 (A, C) and D1/D2 LSU (B, D) regions. A cartoon  
635 of the rRNA locus is shown on top. Genera and candidate genera with at least 5 sequences  
636 encompassing the full region "ITS1-5.8S-ITS2-D1/D2 LSU" were used to construct this plot as  
637 detailed in the methods section. The candidate genera AL4, MN3, MN4, RH3, RH6, and SK3  
638 had only a few sequence representatives (1-3) and so are not included in the plot.

639 **Figure 2.** Box and whisker plots showing the variability in intra-strain length (A-B) and  
640 sequence divergence cutoff (C-D) for the ITS1 (A, C) and D1/D2 LSU (B, D) regions.

641 **Figure 3.** AGF genera distribution across the animal studied. (A) Percentage abundance of AGF  
642 genera in the animals studied. The tree is intended to show the relationship between the animals  
643 and is not drawn to scale. Host phylogeny (family), lifestyle, and gut type are shown for each  
644 animal. The X-axis shows the percentage abundance of AGF genera. (B) Rank abundance curves  
645 are displayed for each animal showing a distribution pattern in which a few genera (1-5)  
646 represent the majority (>10%) of the sequences obtained.

647 **Figure 4.** (A) Phylogenetic tree constructed using the D1/D2 LSU sequences of representatives  
648 of each of the 28 genera/candidate genera identified in this study. Sequences were aligned using  
649 the MAFFT aligner and maximum likelihood tree was constructed in FastTree<sup>61,62</sup>. Bootstrap  
650 values are based on 100 replicates and are shown for branches with >50% bootstrap support.  
651 Genera with cultured representatives are shown in black, uncultured candidate genera identified  
652 in previous ITS1-based studies are shown in green, while the 6 novel genera identified in the  
653 current study are shown in red. The distribution of each of these genera/candidate genera in the  
654 animals studied is shown as a heatmap on the right. (B) AGF genera distribution patterns. The

655 total number of animals harboring each of the genera identified in this study is shown on the Y-  
656 axis, with the different colored stacked bars reflecting the number of animals where the genus  
657 was the most abundant member, occurred with high (>5%) abundance, occurred with medium  
658 (1-5%) abundance, or occurred with low (<1%) abundance. AGF genera are classified into one  
659 of the five distribution patterns shown on top of the graph using empirical cutoffs for ubiquity  
660 (presence in at least 50% of the animals studied, shown as the dotted line across the bottom bar  
661 chart), as well as the fraction of animals where the genus abundance was above 1% (shown as  
662 the top bar chart).

663 **Figure 5.** Nonmetric multidimensional scaling based on pairwise Bray-Curtis dissimilarity  
664 indices at the genus level. Samples are shown as symbols and displayed in black text while AGF  
665 genera are shown as '+' and displayed in red text. (A) Symbols reflect lifestyle with domesticated  
666 animals shown as white squares, zoo-housed animals shown as grey squares, and wild animals  
667 shown as black squares. (B) Symbols reflect animal host phylogeny with family Bovidae shown  
668 as squares, family Cervidae shown as circles, family Equidae shown as hexagons, and family  
669 Camelidae shown as a star. Abbreviations: Am Bison, American bison; Ax deer, Axis deer; B  
670 goat, Boer goat; Bb deer, Blackbuck deer; Dw Goat, Dwarf goat; Fa deer, Fallow deer; Min Don,  
671 Miniature donkey; PD deer, Pere David's deer; WT deer, White-tail deer.

672 **Figure 6.** Workflow diagram describing the methods employed in this study.

Figure 1

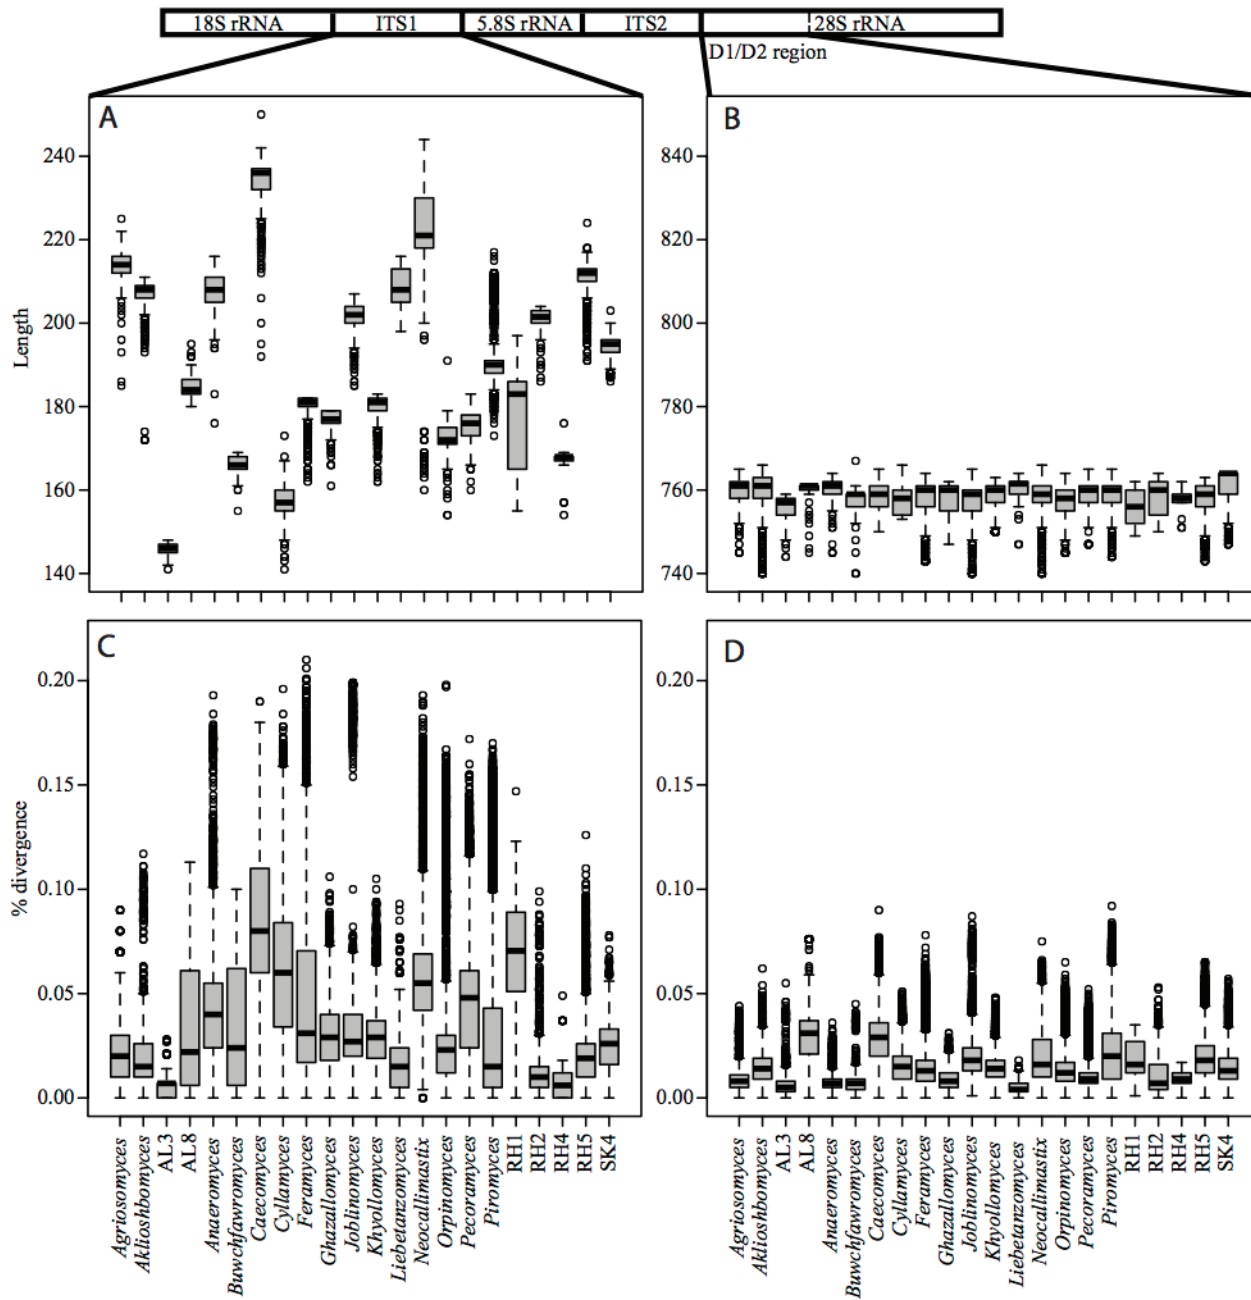

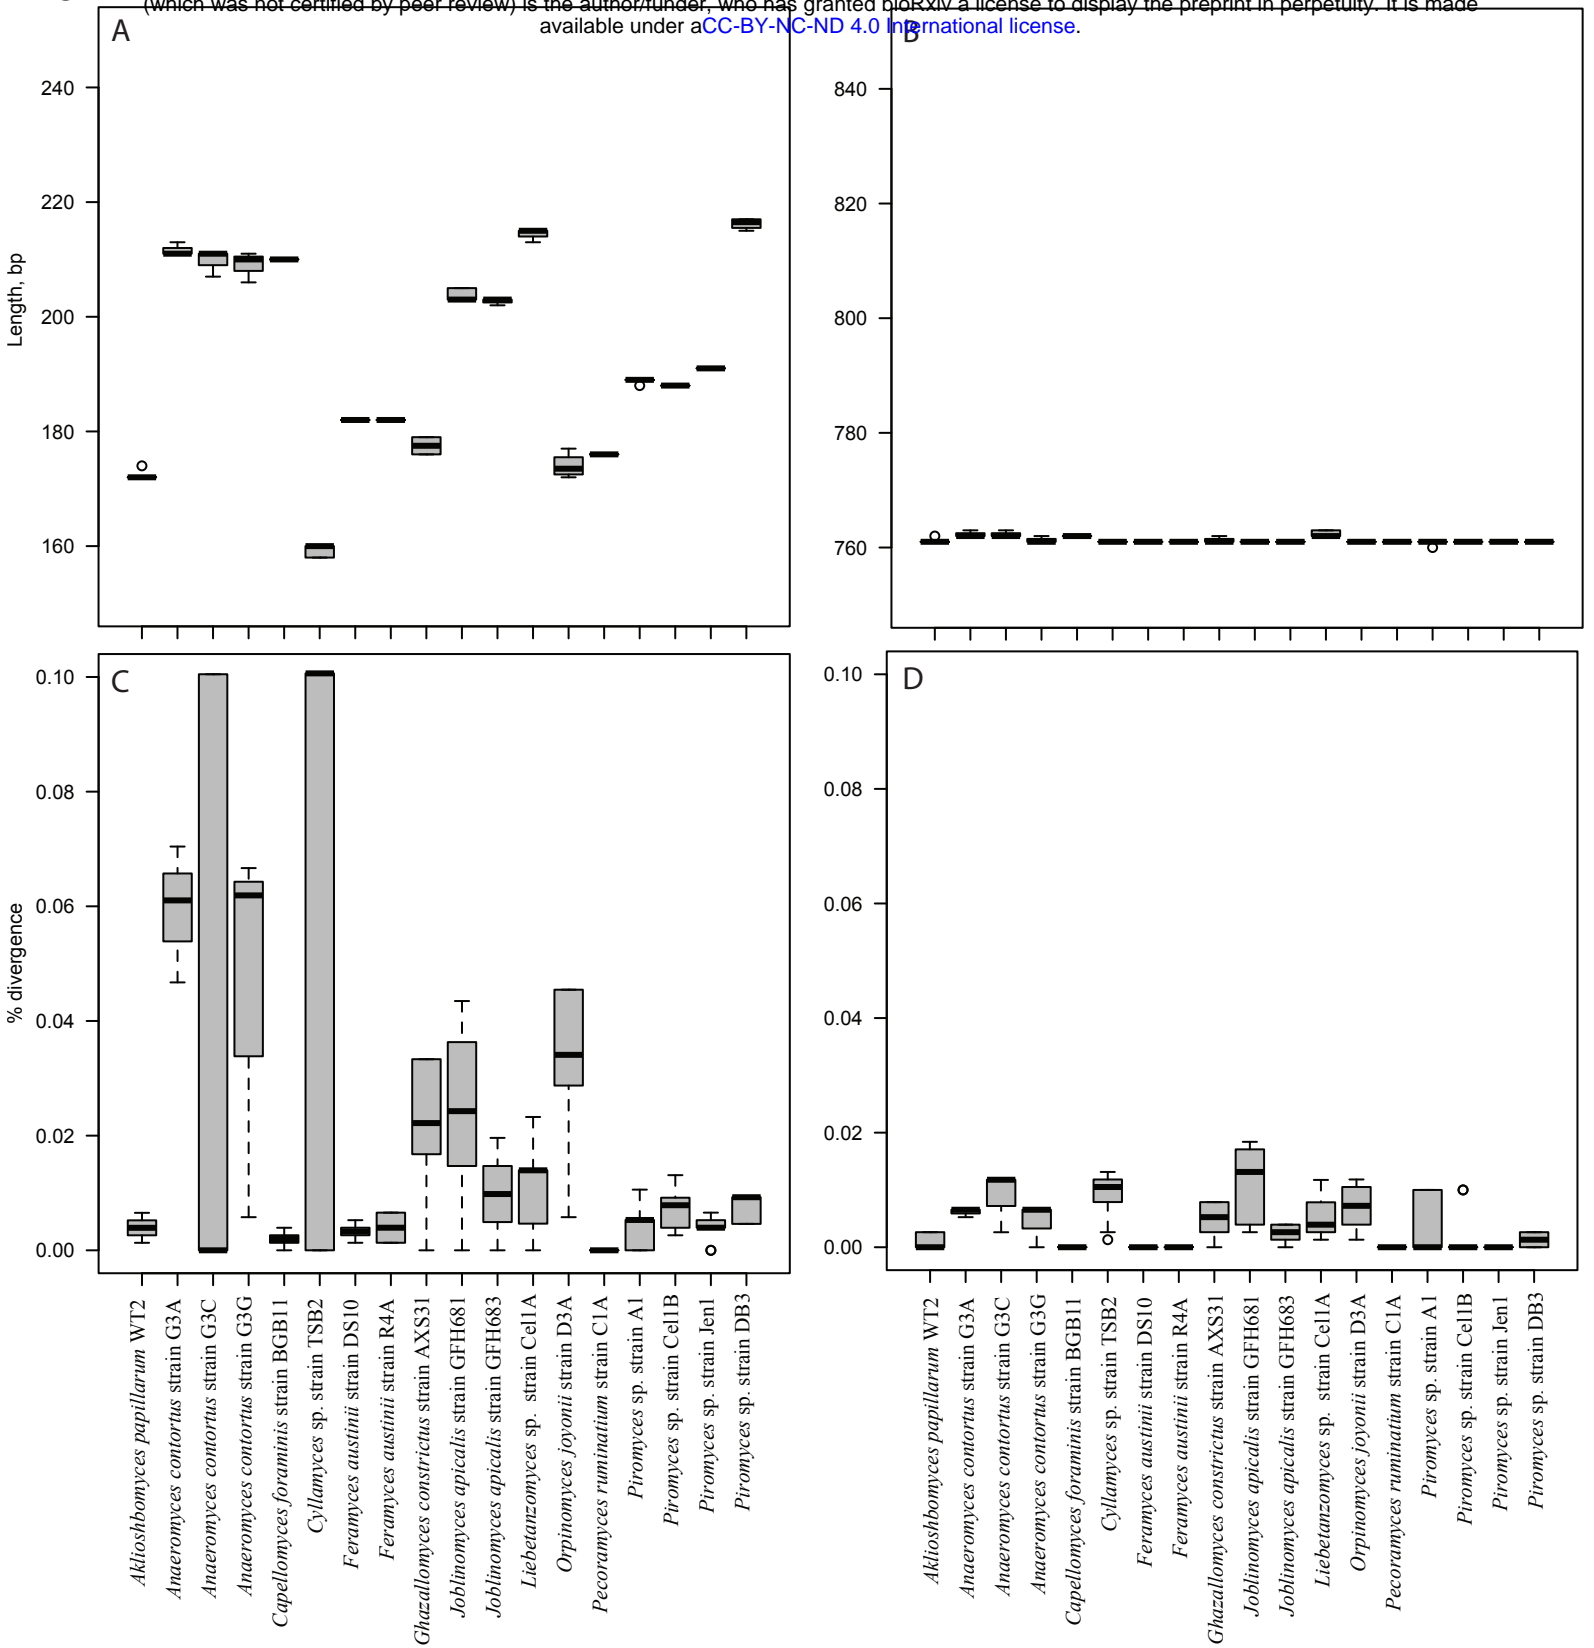



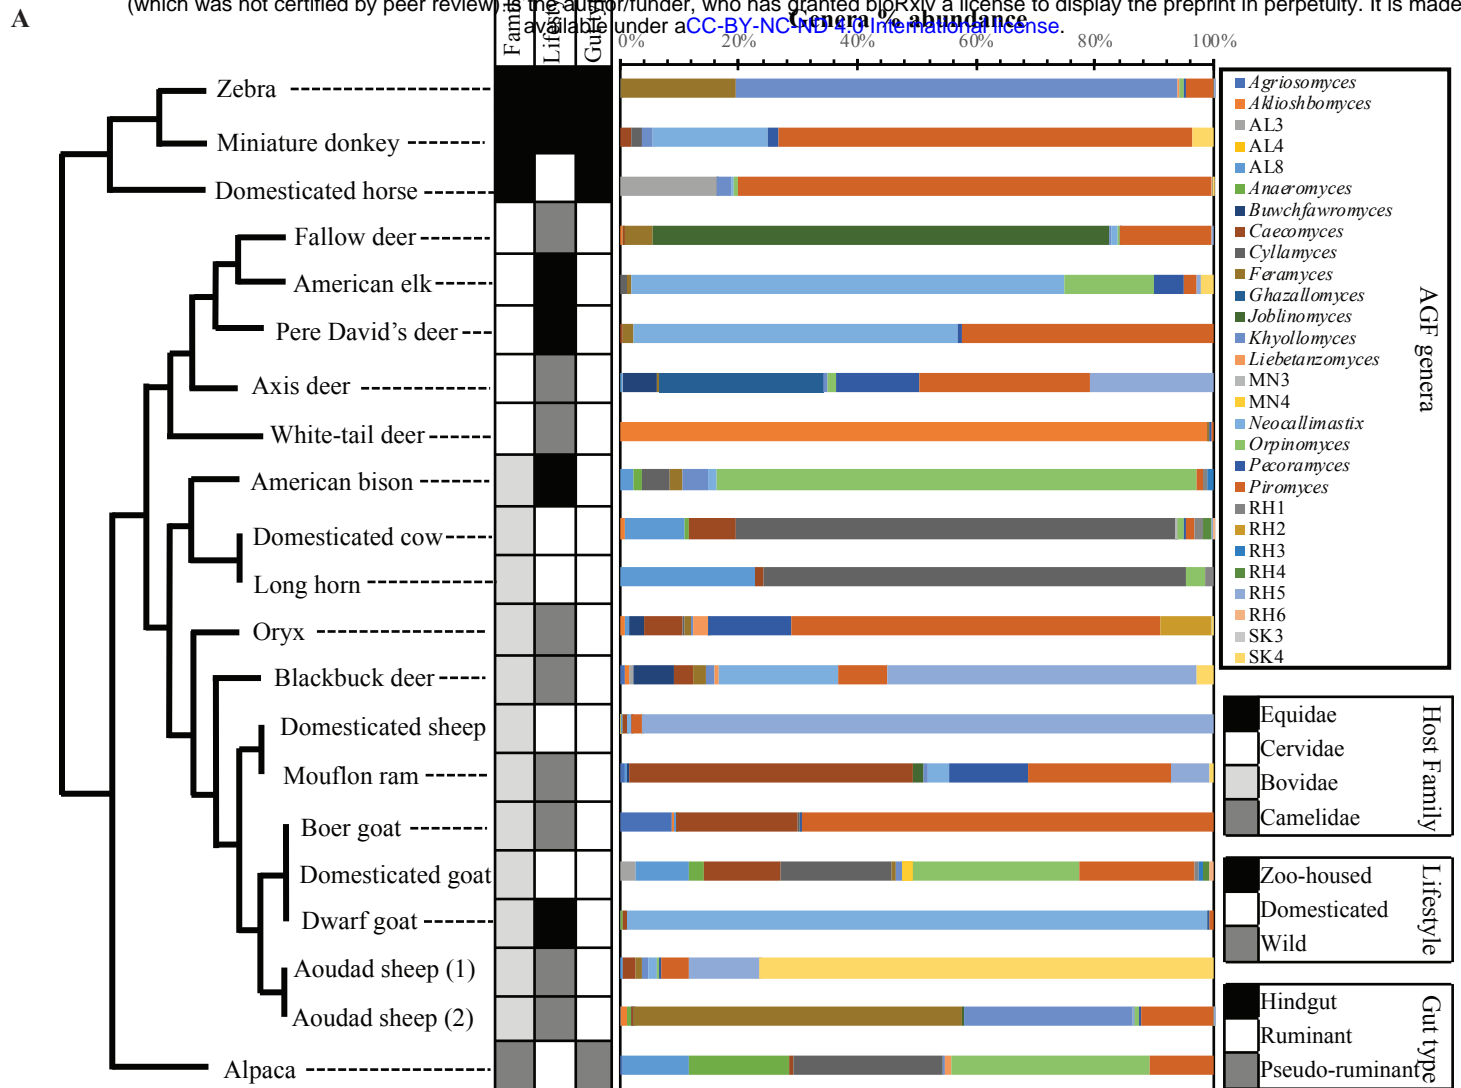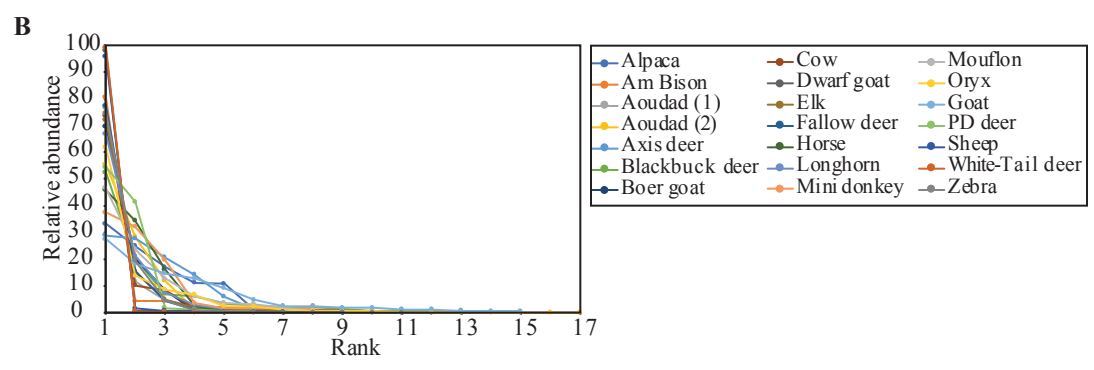

A

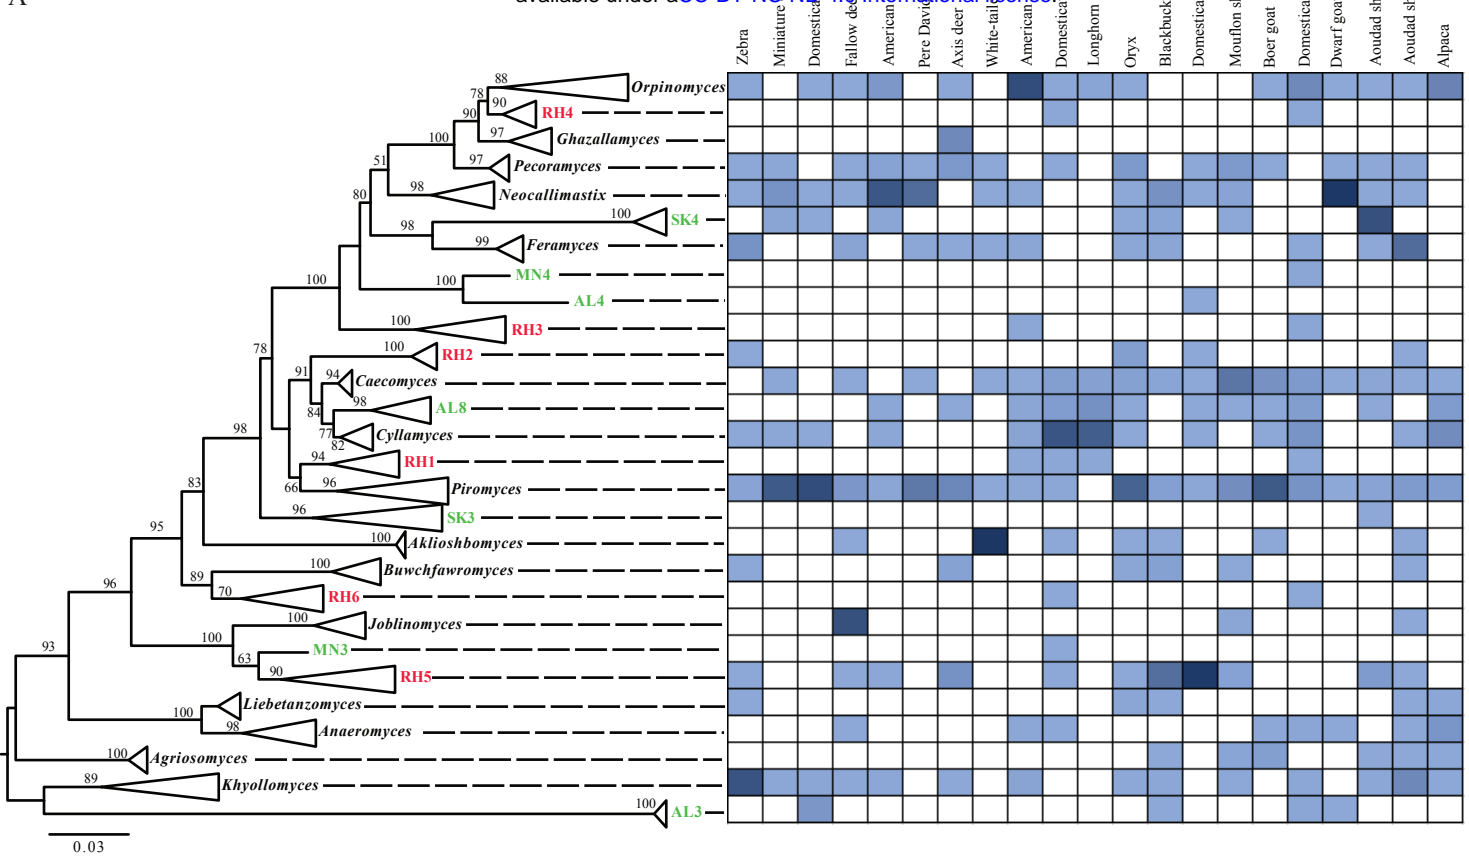

B

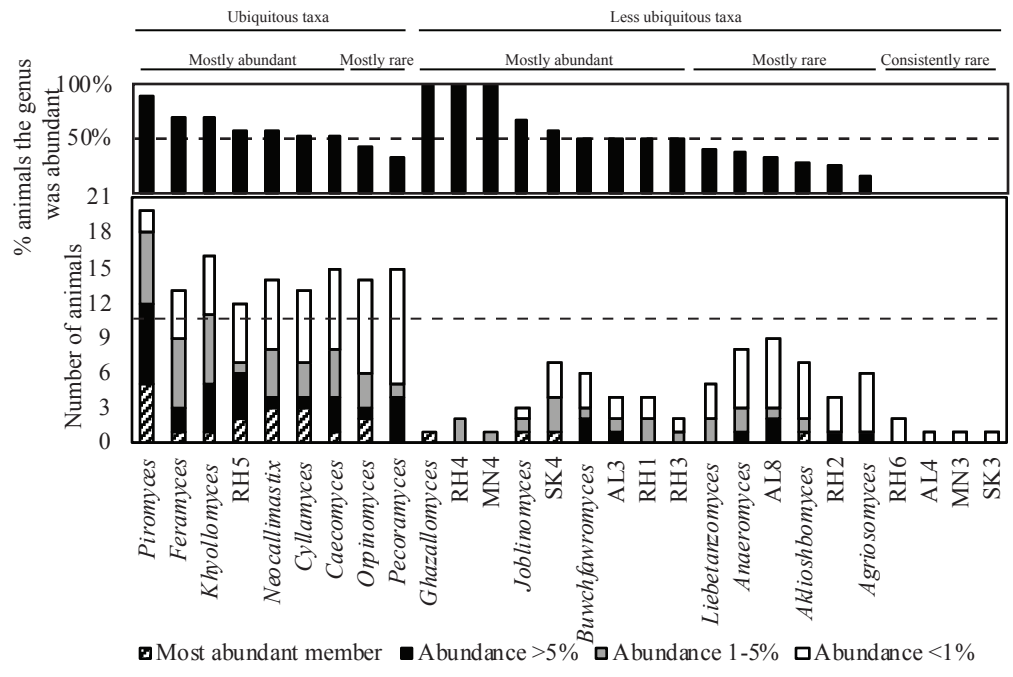

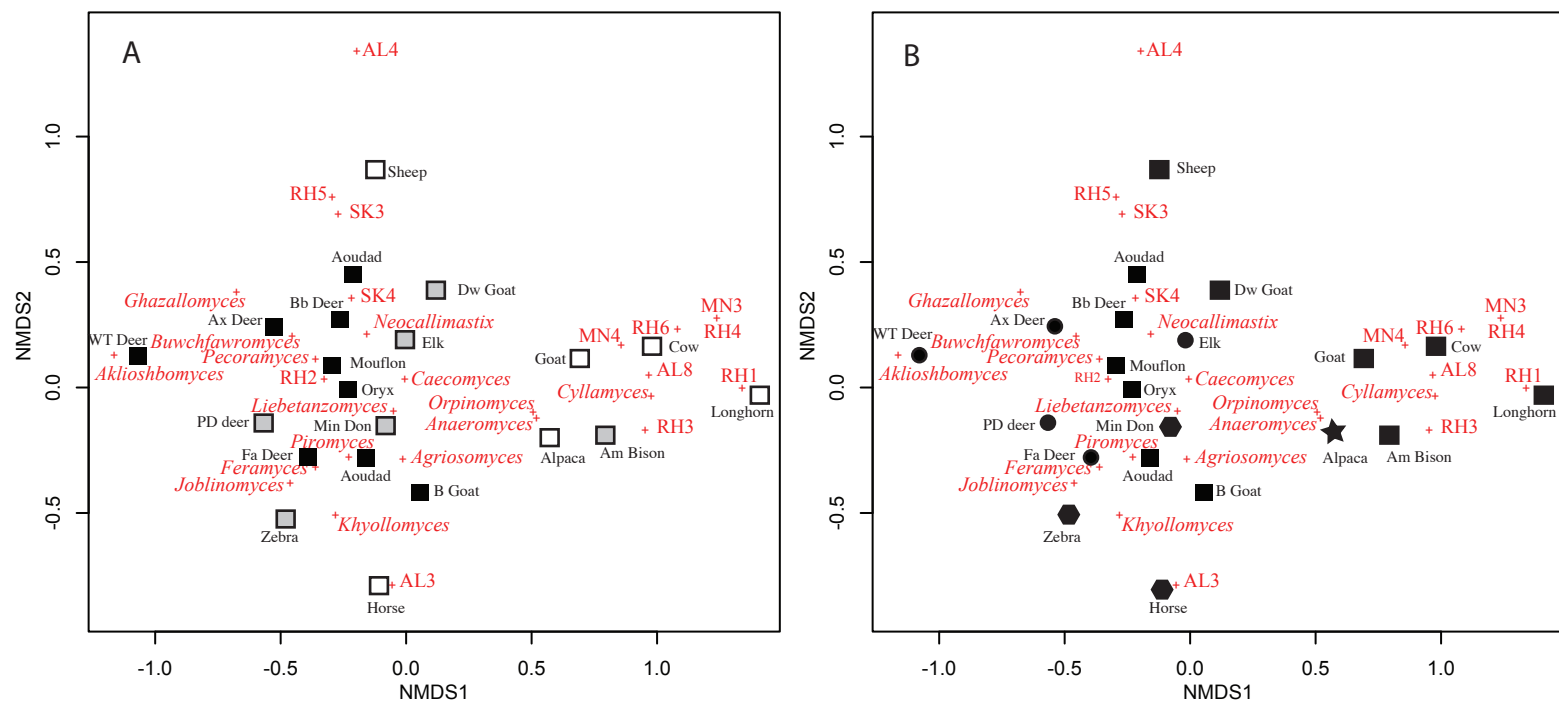

Figure 6

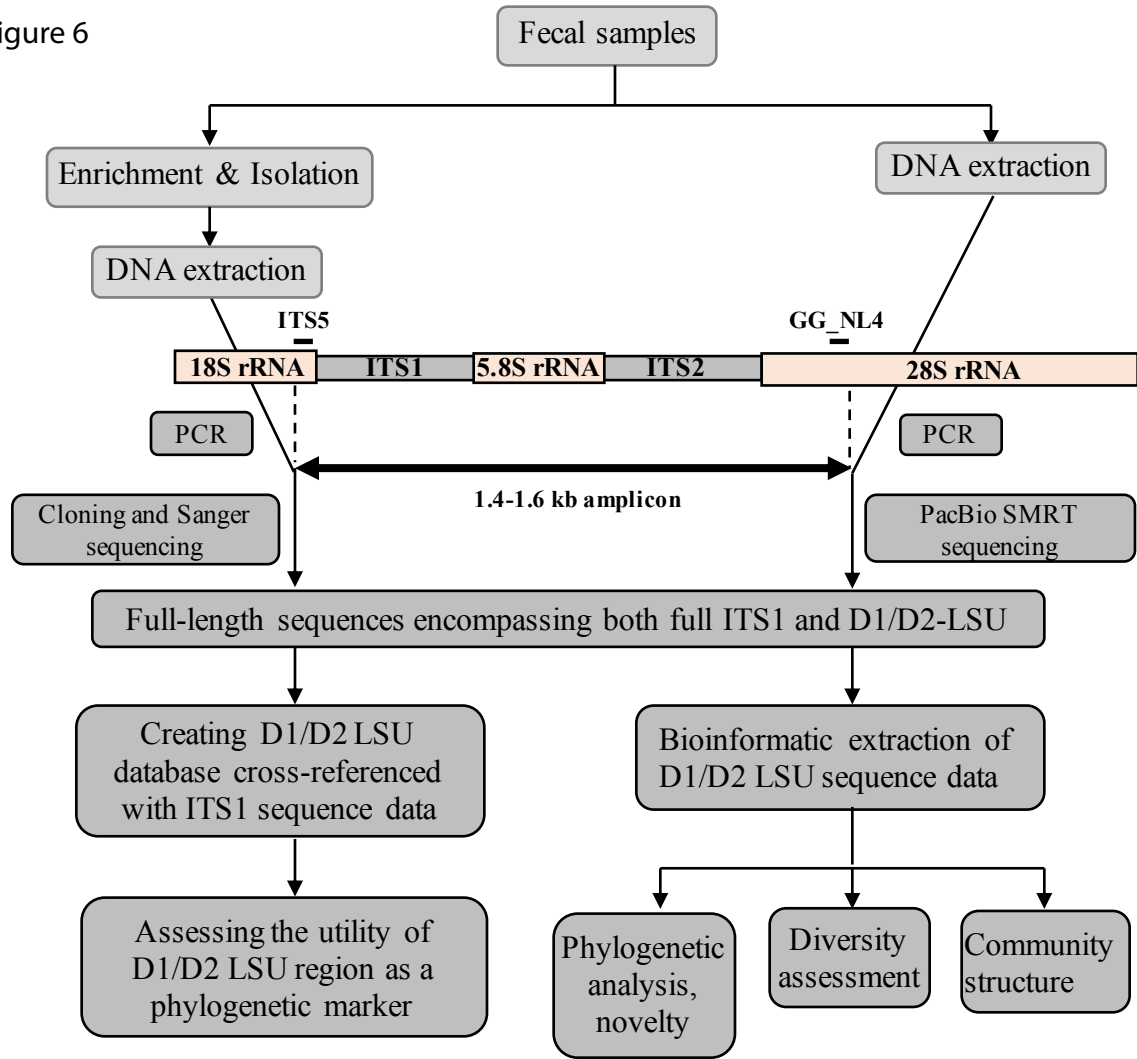

## 673 References

- 674 1. Gruninger RJ, *et al.* Anaerobic Fungi (Phylum Neocallimastigomycota): Advances in  
675 understanding of their taxonomy, life cycle, ecology, role, and biotechnological potential.  
676 *FEMS Microbiol Ecol* **90**, 1-17 (2014).  
677
- 678 2. Wang Y, Youssef NH, Couger MB, Hanafy RA, Elshahed MS, Stajich JE. Molecular  
679 Dating of the emergence of anaerobic rumen fungi and the impact of laterally acquired  
680 genes. *mSystems* **4**, e00247-00219 (2019).  
681
- 682 3. Liggenstoffer AS, Youssef NH, Couger MB, Elshahed MS. Phylogenetic diversity and  
683 community structure of anaerobic fungi (Phylum Neocallymastigales) in ruminant and  
684 non-ruminant herbivores. *ISME J* **4**, 1225–1235 (2010).  
685
- 686 4. Edwards JE, *et al.* Dynamics of initial colonization of nonconserved perennial ryegrass  
687 by anaerobic fungi in the bovine rumen. *FEMS Microbiol Ecol* **66**, 537-545 (2008).  
688
- 689 5. Kittelmann S, G. E. Naylor, J. P. Koolaard, Janssen PH. A proposed taxonomy of  
690 anaerobic fungi (class Neocallimastigomycetes) suitable for large-scale sequence-based  
691 community structure analysis. *PloS one* **7**, e36866 (2012).  
692
- 693 6. Kittelmann S, *et al.* Simultaneous amplicon sequencing to explore co-occurrence patterns  
694 of bacterial, archaeal and eukaryotic microorganisms in rumen microbial communities.  
695 *PloS one* **8**, e47879 (2013).  
696
- 697 7. Edwards JE, *et al.* PCR and omics based techniques to study the diversity, ecology and  
698 biology of anaerobic fungi: insights, challenges and opportunities. *Front Microbiol* **8**,  
699 1657 (2017).  
700
- 701 8. Schoch CL, *et al.* Nuclear ribosomal internal transcribed spacer (ITS) region as a  
702 universal DNA barcode marker for Fungi. *Proc Natl Acad Sci USA* **109**, 6241-6246  
703 (2012).  
704
- 705 9. Nilsson RH, *et al.* The UNITE database for molecular identification of fungi: handling  
706 dark taxa and parallel taxonomic classifications. *Nucl Acids Res* **47**, D259-d264 (2019).  
707
- 708 10. Dore J, Stahl DA. Phylogeny of anaerobic rumen Chytridiomycetes inferred from small  
709 subunit ribosomal RNA sequence comparisons. *Can J Bot* **69**, 1964-1971 (1991).  
710
- 711 11. Kiss L. Limits of nuclear ribosomal DNA internal transcribed spacer (ITS) sequences as  
712 species barcodes for Fungi. *Proc Natl Acad Sci USA* **109**, E1811 (2012).  
713
- 714 12. James TY, *et al.* Reconstructing the early evolution of Fungi using a six-gene phylogeny.  
715 *Nature* **443**, 818-822 (2006).  
716

- 717 13. Koetschan C, *et al.* Internal transcribed spacer 1 secondary structure analysis reveals a  
718 common core throughout the anaerobic fungi (Neocallimastigomycota). *PloS one* **9**,  
719 e91928 (2014).  
720
- 721 14. Edwards JE, Hermes GDA, Kittelmann S, Nijse B, Smidt H. Assessment of the accuracy  
722 of high-throughput sequencing of the *its1* region of Neocallimastigomycota for  
723 community composition analysis. *Front Micorobiol* **10**, 2370 (2019).  
724
- 725 15. Callaghan TM, *et al.* *Buwchfawromyces eastonii* gen. nov., sp. nov.: a new anaerobic  
726 fungus (Neocallimastigomycota) isolated from buffalo faeces. *MycoKeys* **9**, 11-28 (2015).  
727
- 728 16. Mura E, *et al.* Anaerobic fungal communities differ along the horse digestive tract. *Fung*  
729 *Biol* **123**, 240-246 (2019).  
730
- 731 17. Paul SS, Bu D, Xu J, Hyde KD, Yu Z. A phylogenetic census of global diversity of gut  
732 anaerobic fungi and a new taxonomic framework. *Fung Div* **89**, 253-266 (2018).  
733
- 734 18. Kumar S, Indugu N, Vecchiarelli B, Pitta DW. Associative patterns among anaerobic  
735 fungi, methanogenic archaea, and bacterial communities in response to changes in diet  
736 and age in the rumen of dairy cows. *Front Micorobiol* **6**, 781 (2015).  
737
- 738 19. Guadet J, Julien J, Lafay JF, Brygoo Y. Phylogeny of some *Fusarium* species, as  
739 determined by large-subunit rRNA sequence comparison. *Mol Biol Evol* **6**, 227-242  
740 (1989).  
741
- 742 20. Dagar SS, Kumar S, Mudgil P, Singh R, Puniya AK. D1/D2 domain of large-subunit  
743 ribosomal DNA for differentiation of *Orpinomyces* spp. *Appl Environ Microbiol* **77**,  
744 (2011).  
745
- 746 21. Hausner G, Inglis GD, Yanke LJ, Kawchuk LM, Mcallister TA. Analysis of restriction  
747 fragment length polymorphisms in the ribosomal DNA of a selection of anaerobic  
748 chytrids. *Can J Bot* **78**, 917-927 (2000).  
749
- 750 22. Fliegerova K, Mrazek J, Voigt K. Differentiation of anaerobic polycentric fungi by rDNA  
751 PCR-RFLP. *Folia Microbiol* **51**, 273-277 (2006).  
752
- 753 23. Wang X, Liu X, Groenewald JZ. Phylogeny of anaerobic fungi (phylum  
754 Neocallimastigomycota), with contributions from yak in China. *Antonie Van*  
755 *Leeuwenhoek* **110**, 87-103 (2017).  
756
- 757 24. Nagler M, Podmirseg SM, Griffith GW, Insam H, Ascher-Jenull J. The use of  
758 extracellular DNA as a proxy for specific microbial activity. *Appl Microbiol Biotechnol*  
759 **102**, 2885-2898 (2018).  
760

- 761 25. Liu K-L, Porrás-Alfaro A, Kuske CR, Eichorst SA, Xie G. Accurate, Rapid taxonomic  
762 classification of fungal large-subunit rRNA genes. *Appl Environ Microbiol* **78**, 1523-  
763 1533 (2012).  
764
- 765 26. Dagar SS, *et al.* A new anaerobic fungus (*Oontomyces anksri* gen. nov., sp. nov.) from  
766 the digestive tract of the Indian camel (*Camelus dromedarius*). *Fung Biol* **119**, 731-737  
767 (2015).  
768
- 769 27. Hanafy RA, Elshahed MS, Liggenstoffer AS, Griffith GW, Youssef NH. *Pecoramyces*  
770 *ruminantium*, gen. nov., sp. nov., an anaerobic gut fungus from the feces of cattle and  
771 sheep. *Mycologia* **109**, 231-243 (2017).  
772
- 773 28. Hanafy RA, Elshahed MS, Youssef NH. *Feramyces austinii*, gen. nov., sp. nov., an  
774 anaerobic gut fungus from rumen and fecal samples of wild Barbary sheep and fallow  
775 deer. *Mycologia* **110**, 513-525 (2018).  
776
- 777 29. Hanafy RA, Johnson B, Elshahed MS, Youssef NH. *Anaeromyces contortus*, sp. nov., a  
778 new anaerobic gut fungal species (Neocallimastigomycota) isolated from the feces of  
779 cow and goat. *Mycologia* **110**, 502-512 (2018).  
780
- 781 30. Joshi A, Lanjekar VB, Dhakephalkar PK, Callaghan TM, Griffith GW, Dagar SS.  
782 *Liebetanzomyces polymorphus* gen. et sp. nov., a new anaerobic fungus  
783 (Neocallimastigomycota) isolated from the rumen of a goat. *MycKeys* **40**, (2018).  
784
- 785 31. Dollhofer V, Callaghan TM, Dorn-In S, Bauer J, Leubhn M. Development of three  
786 specific PCR-based tools to determine quantity, cellulolytic transcriptional activity and  
787 phylogeny of anaerobic fungi. *J Microbiol Meth* **127**, 28-40 (2016).  
788
- 789 32. Heeger F, *et al.* Long-read DNA metabarcoding of ribosomal RNA in the analysis of  
790 fungi from aquatic environments. *Molec Ecol Resources* **18**, 1500-1514 (2018).  
791
- 792 33. Tedersoo L, Tooming-Klunderud A, Anslan S. PacBio metabarcoding of Fungi and other  
793 eukaryotes: errors, biases and perspectives. *New Phytol* **217**, 1370-1385 (2018).  
794
- 795 34. Griffith GW, Ozkose E, Theodorou MK, Davies DR. Diversity of anaerobic fungal  
796 populations in cattle revealed by selective enrichment culture using different carbon  
797 sources. *Fung Ecol* **2**, 87-97 (2009).  
798
- 799 35. Solomon KV, *et al.* Early-branching gut fungi possess a large, comprehensive array of  
800 biomass-degrading enzymes. *Science* **351**, 1192-1195 (2016).  
801
- 802 36. Haitjema CH, *et al.* A parts list for fungal cellulosomes revealed by comparative  
803 genomics. *Nat Microbiol* **2**, 17087 (2017).  
804
- 805 37. Henske JK, Gilmore SP, Haitjema CH, Solomon KV, O'Malley MA. Biomass-degrading  
806 enzymes are catabolite repressed in anaerobic gut fungi. *AIChE Journal*, (2018).

- 807  
808 38. Henske JK, *et al.* Metabolic characterization of anaerobic fungi provides a path forward  
809 for bioprocessing of crude lignocellulose. *Biotechnol Bioeng* **115**, 874-884 (2018 ).  
810
- 811 39. Seppälä S, Solomon KS, Gilmore SP, Henske JK, Rieth MD, O'Malley MA. Mapping the  
812 membrane proteome of anaerobic gut fungi using RNA-Seq. *Biophys J* **110**, 58a-59a  
813 (2016).  
814
- 815 40. Murphy CL, *et al.* Horizontal Gene Transfer forged the evolution of anaerobic gut fungi  
816 into a phylogenetically distinct gut-dwelling fungal lineage. *Appl Environ Microbiol* **85**,  
817 :e00988-00919 (2019).  
818
- 819 41. Calkins SS, *et al.* Development of an RNA interference (RNAi) gene knockdown  
820 protocol in the anaerobic gut fungus *Pecoramyces ruminantium* strain C1A. *PeerJ* **6**,  
821 e4276 (2018).  
822
- 823 42. Couger MB, Youssef NH, Struchtemeyer CG, Liggenstoffer AS, Elshahed MS.  
824 Transcriptomic analysis of lignocellulosic biomass degradation by the anaerobic fungal  
825 isolate *Orpinomyces* sp. strain C1A. *Biotechnol Bioeng* **8**, 208 (2015).  
826
- 827 43. Youssef NH, *et al.* Genome of the anaerobic fungus *Orpinomyces* sp. C1A reveals the  
828 unique evolutionary history of a remarkable plant biomass degrader. *Appl Environ*  
829 *Microbiol* **79**, 4620-4634 (2013).  
830
- 831 44. Ho YW, Barr DJS, Abdullah N, Jalaludin S, Kudo H. *Piromyces spiralis*, a new species  
832 of anaerobic fungus from the rumen of goat *Mycotaxon* **48**, :59-68 (1993).  
833
- 834 45. Fliegerová K, Mrázek J, Hoffmann K, Záborská J, Voigt K. Diversity of anaerobic fungi  
835 within cow manure determined by ITS1 analysis. *Folia Microbiol* **55**, 319-325 (2010).  
836
- 837 46. Herrera J, Poudel R, Khidir HH. Molecular characterization of coprophilous fungal  
838 communities reveals sequences related to root-associated fungal endophytes. *Microb Ecol*  
839 **61**, 239-244 (2011).  
840
- 841 47. Nicholson MJ, McSweeney CS, Mackie RI, Brookman JL, Theodorou MK. Diversity of  
842 anaerobic gut fungal populations analysed using ribosomal ITS1 sequences in faeces of  
843 wild and domesticated herbivores. *Anaerobe* **16**, 66-73 (2010).  
844
- 845 48. Tuckwell DS, Nicholson MJ, McSweeney CS, Theodorou MK, Brookman JL. The rapid  
846 assignment of ruminal fungi to presumptive genera using ITS1 and ITS2 RNA secondary  
847 structures to produce group-specific fingerprints. *Microbiology* **151**, 1557-1567 (2005).  
848
- 849 49. Nicholson MJ, Theodorou MK, Brookman JL. Molecular analysis of the anaerobic rumen  
850 fungus *Orpinomyces* - insights into an AT-rich genome. *Microbiology* **151**, 121-133  
851 (2005).  
852



- 853 50. Hanafy RA, *et al.* Seven new Neocallimastigomycota genera from wild, zoo-housed, and  
854 domesticated herbivores greatly expand the taxonomic diversity of the phylum.  
855 *Mycologia* doi: 10.1080/00275514.2019.1696619. (2020).  
856
- 857 51. Calkins S, Elledge NC, Hanafy RA, Elshahed MS, Youssef N. A fast and reliable  
858 procedure for spore collection from anaerobic fungi: Application for RNA uptake and  
859 long-term storage of isolates. *J Microbiol Methods* **127**, 206-213 (2016).  
860
- 861 52. Bahram M, Anslan S, Hildebrand F, Bork P, Tedersoo L. Newly designed 16S rRNA  
862 metabarcoding primers amplify diverse and novel archaeal taxa from the environment.  
863 *Environ Microbiol Rep* **11**, 487-494 (2019).  
864
- 865 53. Schloss PD, Jenior ML, Koumpouras CC, Westcott SL, Highlander SK. Sequencing 16S  
866 rRNA gene fragments using the PacBio SMRT DNA sequencing system. *PeerJ* **4**, e1869  
867 (2016).  
868
- 869 54. Schlaeppi K, *et al.* High-resolution community profiling of arbuscular mycorrhizal fungi.  
870 *New Phytol* **212**, 780-791 (2016).  
871
- 872 55. Bryant M. Commentary on the Hungate technique for culture of anaerobic bacteria. *Am J*  
873 *Clin Nutr* **25**, 1324-1328 (1972).  
874
- 875 56. Hungate RE. A roll tube method for cultivation of strict anaerobes. *Meth Microbiol* **3**,  
876 117-132 (1969).  
877
- 878 57. Solomon KV, Henske JK, Theodorou MK, O'Malley MA. Robust and effective  
879 methodologies for cryopreservation and DNA extraction from anaerobic gut fungi.  
880 *Anaerobe* **38**, 39-46 (2016).  
881
- 882 58. Ho YW, Barr DJS. Classification of anaerobic gut fungi from herbivores with emphasis  
883 on rumen fungi from Malaysia. *Mycologia* **87**, 655-677 (1995).  
884
- 885 59. Schloss PD, *et al.* Introducing mothur: open-source, platform-independent, community-  
886 supported software for describing and comparing microbial communities. *Appl Environ*  
887 *Microbiol* **75**, 7537 (2009).  
888
- 889 60. Katoh K, Standley DM. MAFFT multiple sequence alignment software version 7:  
890 improvements in performance and usability. *Mol Biol Evol* **30**, 772-780 (2013).  
891
- 892 61. Price MN, Dehal PS, Arkin AP. FastTree: computing large minimum evolution trees with  
893 profiles instead of a distance matrix. *Mol Biol Evol* **26**, 1641-1650 (2009).  
894
- 895 62. Price MN, Dehal PS, Arkin AP. FastTree 2--approximately maximum-likelihood trees for  
896 large alignments. *PloS one* **5**, e9490 (2010).  
897  
898
